# Supplementary material for: Cerebrospinal fluid lipidomics for biomarkers of Alzheimer's disease
Source: Royal Society of Chemistry journal article supplement (doi:10.1039/d0mo00186d), 2021-03-18
Supplement: d0mo00186d1.xlsx [file d0mo00186d1.xlsx]

## Sheet: Table S1
Byeon et al. (2020) Cerebrospinal fluid lipidomics for biomarkers of Alzheimer’s disease
Supplementary Table S1. Peak area ratios of cerebrospinal fluid lipids detected in the study
Lipid species	m/z	Retenton time (min)	Control 1	Control 2	Control 3	Control 4	Control 5	Control 6	Control 7	Control 8	Control 9	Control 10	Control 11	Control 12	Control 13	Control 14	Control 15	Control 16	Control 17	Control 18	MCI 1	MCI 2	MCI 3	MCI 4	MCI 5	MCI 6	MCI 7	MCI 8	MCI 9	MCI 10	MCI 11	MCI 12	MCI 13	MCI 14	MCI 15	AD 1	AD 2	AD 3	AD 4	AD 5	AD 6	AD 7	AD 8	AD 9	AD 10	AD 11	AD 12	AD 13	AD 14
16:0-LPC	496.34	10.5012	0.713169	0.608561	1.50507	0.911536	1.13423	0.728	0.72877	1.75167	0.774671	1.7394	0.853301	1.03071	0.675971	0.2958	0.664868	0.887729	0.470613	0.270022	0.482303	0.83172	0.264196	0.701858	0.540178	0.399851	0.481013	0.782061	1.4463	0.992644	0.565016	2.25833	1.28966	0.537471	2.14587	0.335322	1.12266	0.580568	1.04977	0.445905	1.68656	1.71836	0.516071	1.06237	0.555573	0.313127	0.616484	0.93439	0.311954
16:0e-LPC	482.361	11.1806	0.0130317		0.0157734	0.0130275	0.0186498	0.0128003	0.00342744	0.054259	0.00920739	0.0346724	0.00490681	0.00205977	0.009369		0.00515073	0.0111272	0.0130831		0.00548526	0.00661706	0.00487019	0.00282835	0.00169397	0.00156202	0.000898195	0.00733899	0.0275052	0.00250426	0.00109338	0.0284374	0.00346055	0.00704305	0.0249774		0.0195598	0.000696325	0.0145895	0.000715954	0.0189837	0.018956	0.00180337	0.00560919	0.0050927	0.00149785	0.0127985	0.0148231
18:0-LPC	524.371	11.8927	0.35103	0.273935	0.471855	0.295271	0.643356	0.353954	0.410808	1.51156	0.366326	0.935077	0.495457	0.318247	0.325699	0.11164	0.352776	0.651459	0.39786	0.205767	0.394833	0.369489	0.278333	0.45837	0.285325	0.252612	0.256281	0.551846	0.6505	0.319596	0.182915	0.812811	0.287008	0.181561	1.2646	0.238847	0.885989	0.591726	0.599513	0.192172	1.05571	0.362618	0.0974568	0.211464	0.19337	0.110672		0.455549
18:1-LPC	522.355	10.8	1.43445	0.956381	2.14229	1.61531	0.89808	0.637757	1.23602	0.977677	0.68203	2.01913	0.960519	2.34999	0.625383	0.437122	0.284285	0.364227	0.230748	0.188201	0.250243	0.668892	0.182634	0.583472	0.859134	0.713279	0.32655	0.3135	0.426504	0.2501	0.398595	0.655975	2.24523	0.290172	1.38364	0.305436	0.756529	0.358397	0.455502	0.519712	1.09835	1.68084	0.649577	1.34637	0.750074	0.456417	1.02742	1.15968	0.561359
18:2-LPC	520.34	10.15	0.279451	0.116683	0.245247	0.170642	0.122473	0.0736541	0.122951	0.155811	0.0728291	0.316151	0.209535	0.355518	0.102833	0.0303981	0.0136791	0.0331702	0.0264812	0.0225567	0.0192598	0.0581908	0.0194106	0.0729429	0.124128	0.0857294	0.020822	0.0214539	0.0251773	0.00588855	0.0302145	0.0457893	0.30307	0.0506768	0.209283	0.0287541	0.075	0.066055	0.0393098	0.0538255	0.172705	0.164052	0.0889365	0.137786	0.0868581	0.0322623	0.204007	0.300602	0.195123
20:0-LPC	552.402	13.6135	0.277877	0.265603	0.318191	0.241626	0.324157		0.224247	0.167405	0.129129	0.149049	0.169977	0.135186	0.145145	0.132236	0.022853	0.162214	0.141336	0.164545	0.140872	0.0664828	0.13268	0.203489	0.139974	0.132983	0.267575	0.141262	0.159157	0.161279	0.149771	0.220018	0.0439952	0.268657	0.0209344	0.29212	0.28071	0.345249	0.159345	0.0756822	0.0283934	0.0397506	0.00481604	0.00536941	0.0798567	0.0024442	0.0067122	0.0103779	0.0218232
20:1-LPC	550.387	11.9748	0.00750437	0.00819817	0.0211019	0.00902249	0.00848068	0.00697709	0.0123282	0.032107	0.0108276	0.0293116	0.0144409	0.0153317	0.00982416	0.00215689	0.0118414	0.0168424	0.00842558	0.00405255	0.00901976	0.0128484	0.00585876	0.0109949	0.0047936	0.00620881	0.00885757	0.0134279	0.0133101	0.00968276	0.00494854	0.0177216	0.0162282	0.00336871	0.0159172	0.00279682	0.0143203	0.0048056	0.0169531	0.00455617	0.0150643	0.021852	0.00478041	0.0101601	0.00562341	0.00314268	0.00729422	0.0124173	0.00540562
20:3-LPC	546.355	10.363	0.0646277	0.0501958	0.0933874	0.0921883	0.0606583	0.0409859	0.0796704	0.0674614	0.029885	0.0806078	0.0671037	0.106758	0.0534546	0.022298	0.00683946	0.0193683	0.0207125	0.0275428	0.0221763	0.0120404	0.0191262	0.0373728	0.0369989	0.0381779	0.00548694	0.0274444	0.00485441	0.018299	0.0219416	0.00959008	0.111714	0.0494035	0.0399587	0.0597472	0.063492	0.0605989	0.0179043	0.0397162	0.0355827	0.0560136	0.0151775	0.0386474	0.0277406	0.00930112	0.0324405	0.0771083	0.0360702
20:4-LPC	544.34	9.93493	1.0179	0.562866	0.914686	0.583135	0.526342	0.205651	0.616626	0.566407	0.39921	1.28338	0.582559	1.26678	0.380245	0.214925	0.0784368	0.128461	0.0827785	0.0699412	0.0634338	0.285336	0.0620521	0.285889	0.339057	0.339082	0.176411	0.103064	0.0714627	0.042692	0.151423	0.132266	1.29069	0.131517	0.569564	0.100143	0.257384	0.166515	0.129986	0.229936	0.538508	1.03171	0.214923	0.689915	0.432665	0.207857	0.490522	0.762552	0.408079
22:4-LPC	572.371	10.63		0.0358345	0.0662624	0.0545859	0.038693	0.0148965	0.0424673	0.0423352	0.0248851	0.0945176	0.0405267	0.0919466	0.0275132	0.0173477	0.00367218	0.0057603	0.00475408	0.00382982	0.00483445	0.0223581	0.00142865	0.0252678	0.0261527	0.031451	0.0098968	0.0109756	0.00670946	0.00171004	0.00992221	0.0104432	0.0974366	0.00815726	0.036425	0.00728919	0.016782	0.00881222	0.00855383	0.0150807	0.0365099	0.0916738	0.0148011	0.0533627	0.0342762	0.0191591	0.0369247	0.0576905	0.0222244
22:6-LPC	568.34	9.89192	0.986192	0.805776	0.8224	0.815961	1.10322	0.832617	0.72152	0.842516	0.829386	0.9323	0.854911	0.808488	0.797784	0.843486	0.518358	0.732978	0.726844	1.17683	0.781877	0.741963	0.863402	0.987834	0.900644	0.766471	0.730924	0.986423	0.852518	0.863852	0.862813	1.14115	0.578084	0.72805	1.41164	0.772703	0.931397	1.10202	1.02612	0.633972	1.1293	1.14994	1.10156	1.02328	1.09039	1.03801	1.15275	1.43348	1.09581
14:0/18:1-PC	732.554	20.8	1.37204	1.98203	2.22532	1.91877	2.0424	1.51864	2.6297	2.69817	2.20277	2.50083	2.64862	2.17467	2.5752	1.75924	2.51831	2.91475	2.03185	1.07699	1.92766	2.05524	2.00904	3.59956	1.84533	1.49186	2.17911	2.27531	1.53429	0.938041	1.53692	1.60331	2.03171	1.71828	2.171	1.71063	2.14884	2.04907	2.54747	1.76368	1.31905	2.10725	0.792097	2.36792	0.96873	1.4912	1.73826	1.74662	0.595298
14:0/18:2-PC	730.538	19.362	0.0549151	0.0511803	0.0826213	0.0596262	0.057682	0.0123794	0.0670564	0.0980214	0.0690548	0.0570079	0.0599676	0.0806492	0.0690019	0.0502085	0.0718051	0.10303	0.0610736	0.03888	0.0758953	0.0430382	0.0676272	0.100405	0.063613	0.0401887	0.0335212	0.0618393	0.0555616	0.0183951	0.0371558	0.0510016	0.0913664	0.0525534	0.0902308	0.0588579	0.0595533	0.0555228	0.0553201	0.0487456	0.0414339	0.048159	0.0200824	0.0479571	0.0267418	0.0318438	0.0477768	0.0647723	0.043628
16:0/14:0-PC	706.538	20.4817	2.63909	3.66247	3.90838	3.64083	4.2559	4.26823	4.47497	4.61222	4.57079	5.02293	4.4593	3.86726	4.13204	3.7085	4.19858	5.25189	3.77625	2.09383	3.63717	3.84016	3.06357	6.67523	3.02357	2.70919	4.4912	3.60638	2.86814	1.52088	2.1089	2.96261	2.70532	2.81487	3.19123	3.50925	3.01402	3.66297	4.19244	2.62907	2.47347	2.70316	1.13991	3.47732	1.87412	2.36324	3.31826	2.51891	0.974464
16:0/16:0-PC	734.569	22.7758	12.8938	15.4436	15.582	13.4251	21.8419	22.0666	16.3715	16.3194	15.6634	21.1245	18.1643	16.0559	16.621	14.7061	20.0677	21.9688	17.2733	8.68264	12.2355	19.7782	12.4401	23.4702	12.3629	11.1225	21.0241	15.0015	9.53175	7.49812	7.37224	12.5858	12.6576	8.94751	9.60443	12.7485	10.8714	16.7765	18.097	12.1816	9.36106	11.1814	5.58076	16.1468	6.85035	9.23576	12.794	10.749	4.62315
16:0/16:1-PC	732.554	21.1	2.14907	2.31322	2.62336	2.40341	3.21234	1.92429	3.04201	3.45116	2.74953	3.17819	2.86882	2.68119	2.51442	2.32784	2.41733	3.46629	2.30891	1.59711	2.73725	2.74643	2.41156	4.36235	2.47132	2.15222	2.7409	2.03578	2.15804	1.87982	1.25831	1.90252	1.88628	1.86054	2.66572	2.21019	2.36415	2.06831	2.44206	2.35876	2.2842	2.07279	1.05514	2.70446	1.37205	1.61629	2.18928	2.23681	0.71182
16:0/18:1-PC	760.585	23.0379	91.0769	95.5637	92.5723	86.8687	113.757	83.5491	122.721	131.333	110.704	107.522	107.969	91.6278	101.02	94.2142	118.09	115.713	88.5576	59.3328	85.3362	114.134	84.564	139.431	88.3474	77.7988	87.3325	87.7098	61.9249	49.4959	54.842	80.0406	85.5554	72.8724	80.0787	77.0576	71.8939	85.5699	93.7847	86.9585	53.8316	97.4513	41.3096	74.7839	47.0619	65.0528	78.884	71.8495	31.298
16:0/18:2-PC	758.569	21.3469	12.2927	9.74756	10.4656	7.61494	13.9438	4.44415	14.3936	24.677	9.93945	13.1523	13.7247	9.61488	11.0127	7.64177	8.16134	13.9834	11.3695	7.77436	12.6931	10.1177	11.9397	14.7161	13.1071	8.04464	5.63155	12.7473	10.0321	3.66895	6.77491	11.6428	11.9704	14.5844	21.0771	8.97311	13.9462	9.75213	10.4814	7.57756	13.1752	5.88282	3.33616	7.83756	4.42319	4.70903	12.9052	16.4348	9.76546
16:0/18:3-PC	756.554	22.8042	1.6371	1.85991	1.64687	1.61722	2.2528	2.27101	1.97532	1.78779	1.84283	2.00127	1.82494	1.83095	1.89668	1.8266	2.42054	2.13248	1.93899	1.10286	1.48024	2.11905	1.50956	2.51307	1.49031	1.35496	1.73085	1.63444	1.17503	0.948474	0.915317	1.51157	1.60954	1.09156	1.20497	1.41133	1.21384	1.87318	1.50588	1.50586	1.13837	1.38448	0.718415	1.43552	0.846527	1.15858	1.32792	1.2813	0.569618
16:0/20:3-PC	784.585	22	2.05696	1.52642	1.73989	1.79464	2.53927	1.34746	2.56532	6.95331	1.95415	1.99618	1.9136	1.51826	2.23078	1.38093	1.77133	2.88179	2.35839	1.14716	2.01135	1.62629	1.42867	2.67693	1.7483	1.70831	1.23671	2.22372	1.87901	0.56091	1.31814	1.93747	2.01649	2.27074	3.98587	1.95065	2.65777	1.46662	1.92974	1.22328	2.02938	1.48935	0.823877	1.30236	1.10245	1.17674	1.9425	4.58609	1.08636
16:0/20:4-PC	782.569	21.0981	9.63967	9.36753	11.8605	7.22404	15.7337	5.41275	14.1343	22.1581	14.2902	15.7582	12.9118	7.57848	11.8159	8.42134	9.75894	15.8798	10.5491	5.02835	10.4553	12.7339	8.37466	17.3977	7.49013	9.51664	8.95291	10.856	6.29684	4.48631	5.14498	8.71543	9.19186	11.1774	16.9853	8.61013	14.6095	9.05699	10.8947	6.31657	8.66466	8.77349	3.94071	9.06234	5.26117	6.85019	12.0544	13.0961	4.121
16:0/20:5-PC	780.554	19.8658	0.103454	0.226956	0.106413	0.114912	0.153893	0.0608164	0.11105	0.275773	0.106206	0.116107	0.211003	0.159907	0.107609	0.0804436	0.118293	0.141097	0.114301	0.058296	0.117371	0.12196	0.730612	0.129336	0.162785	0.067959	0.07077	0.223962	0.0711386	0.0316349	0.10371	0.0707606	0.0936209	0.195502	0.640691	0.145533	0.374773	0.263333	0.0761015	0.188145	0.101838	0.0769074	0.0346085	0.0551269	0.0333053	0.0528595	0.0969457	0.10936	0.139912
16:0/22:4-PC	810.601	23.4758	7.99902	7.85247	8.81757	5.69667	14.564	6.08628	11.8474	18.5241	10.9071	11.9213	11.4709	6.82124	8.95421	7.15024	8.55099	13.1976	9.98972	4.62688	8.17884	10.3485	6.81144	12.802	5.75329	6.95592	8.89235	7.77223	5.56672	3.52469	3.43716	6.5773	6.8691	7.6132	10.1273	7.93969	11.4816	7.27165	9.43678	4.80147	6.69409	6.92766	2.52414	7.05631	3.5752	4.27575	8.30361	9.15364	2.48411
16:0/22:6-PC	806.569	20.7466	2.02108	3.40704	3.06912	2.04867	3.23144	1.71037	4.21165	4.37358	2.99101	3.25998	4.59808	3.31938	2.7952	2.13316	3.41415	4.07301	2.3356	1.557	2.06086	4.28787	3.07237	3.97564	2.92833	2.00579	2.78441	3.92006	1.56731	0.804314	1.42662	1.98687	2.21014	2.123	5.26644	2.14825	3.8748	2.86756	3.41288	2.32897	2.02218	1.92021	1.00414	2.67501	1.04357	1.54176	3.39874	3.37015	1.01312
16:0e/14:0-PC	692.559	21.9275	0.029762	0.0278498	0.0452507	0.0421322	0.0475793	0.0561551	0.0450903	0.0723865	0.0462906	0.0494685	0.0415587	0.0358159	0.0491111	0.0299838	0.0385996	0.048742	0.0411718	0.024644	0.0586733	0.0393976	0.0342006	0.0629965	0.0356076	0.0304192	0.0256411	0.0351964	0.0486078	0.0103272	0.0283037	0.0383129	0.0374857	0.0406091	0.0496187	0.0392621	0.041239	0.0343687	0.0431694	0.0268156	0.0361607	0.02028	0.0119952	0.0276557	0.0204758	0.0253489	0.0407078	0.0387183	0.0127203
16:0e/16:0-PC	720.59	21.55	0.0714526	0.077633	0.0801522	0.0656878	0.0602768	0.0250584	0.0939927	0.0845203	0.0800367	0.0581177	0.0713347	0.0643978	0.0712254	0.0723368	0.0690152	0.0631199	0.0762592	0.0722947	0.0713001	0.0629455	0.0665039	0.0680508	0.0756816	0.0777199	0.0560635	0.0654021	0.0746689	0.0786654	0.0594783	0.0721987	0.0867037	0.0811501	0.091654	0.0756896	0.0691123	0.0729704	0.0639084	0.0870455	0.0691222	0.119002	0.0799538	0.0610465	0.0716747	0.0768616	0.0641394	0.0733682	0.0811606
16:0e/16:1-PC	718.575	22.6	0.169881	0.17521	0.257551	0.253432	0.318025	0.190584	0.298267	0.396265	0.243567	0.376268	0.224963	0.215607	0.271573	0.158303	0.162647	0.27643	0.190164	0.131244	0.363923	0.281954	0.186965	0.380404	0.227024	0.176459	0.143095	0.161103	0.260711	0.0727041	0.143427	0.18779	0.188954	0.212762	0.255016	0.196426	0.277052	0.155639	0.264904	0.163598	0.234326	0.139906	0.0627015	0.188329	0.0939633	0.150307	0.256573	0.220912	0.0703964
16:0e/18:1-PC	746.606	24.7321	1.38169	1.28458	1.6916	1.7748	2.09308	1.30883	2.11227	2.30429	1.77613	2.22358	1.58185	1.78475	1.67496	1.30148	1.49538	1.92244	1.46009	1.041	2.01196	1.83205	1.38126	2.21273	1.74339	1.36529	1.13329	1.16934	1.56444	0.724593	0.913582	1.35906	1.38328	1.4743	1.69303	1.38531	1.60637	1.22725	1.4269	1.17559	1.5243	1.35646	0.569764	1.11289	0.835699	0.992067	1.49099	1.343	0.640886
16:0e/18:2-PC	744.59	22.8745	0.304325	0.199686	0.298777	0.253612	0.547638	0.234038	0.37527	0.487202	0.299889	0.498082	0.344915	0.295493	0.332991	0.172776	0.264681	0.374122	0.349896	0.18219	0.354467	0.302765	0.29273	0.470368	0.325106	0.210836	0.16706	0.246498	0.298704	0.06985	0.125532	0.302673	0.273556	0.317737	0.326056	0.269547	0.323701	0.244785	0.214269	0.148121	0.351706	0.151671	0.090247	0.197137	0.0955675	0.141757	0.412245	0.395876	0.157803
16:0e/20:3-PC	770.606	23.9653	0.290345	0.21943	0.214754	0.188502	0.17032	0.0887029	0.19301	0.150743	0.20888	0.182968	0.157739	0.20358	0.196088	0.247716	0.218152	0.152355	0.169279	0.228765	0.200382	0.164847	0.208408	0.166477	0.210211	0.242398	0.164136	0.193671	0.211005	0.269196	0.279622	0.228843	0.211074	0.210106	0.21227	0.235281	0.175744	0.213224	0.189046	0.317084	0.19201	0.309522	0.243525	0.172775	0.24634	0.225359	0.174173	0.19153	0.249792
16:0e/20:4-PC	768.59	22.5947	0.694475	0.668074	1.05829	0.684389	1.69559	0.66709	1.08166	2.26086	1.11503	1.67537	1.26198	0.792774	1.10315	0.596477	0.748803	1.42963	0.970785	0.447116	1.03975	1.06682	0.787482	1.64706	0.644749	0.750699	0.763173	1.01755	0.82822	0.284828	0.40894	0.866778	0.942761	0.937981	1.06366	0.657542	1.33195	0.799661	1.24116	0.567355	0.818427	0.598981	0.270508	0.796094	0.37714	0.513616	1.1888	1.17228	0.346382
16:0e/22:4-PC	796.621	24.63	0.0834297	0.0517835	0.0664376	0.0681743	0.140643	0.0469223	0.106761	0.177545	0.092001	0.135058	0.0769942	0.0863353	0.0855446	0.0654384	0.0615262	0.107155	0.0842088	0.0440524	0.087817	0.10473	0.033018	0.138022	0.0536648	0.0777128	0.051051	0.0707369	0.0914975	0.0334236	0.0534571	0.072347	0.0924368	0.0732739	0.0842979	0.0649385	0.099209	0.0448596	0.0794789	0.0302395	0.0676346	0.0680268	0.031273	0.0502187	0.0462323	0.0484133	0.0722078	0.105472	0.0309665
16:0e/22:6-PC	792.59	22.4	0.0739973	0.15107	0.109539	0.0684038	0.195141	0.0869324	0.134377	0.267631	0.0965898	0.168359	0.138246	0.164744	0.167857	0.0712282	0.159158	0.27026	0.170464	0.0967532	0.114556	0.135533	0.187001	0.242764	0.111944	0.0844312	0.0870468	0.168711	0.119233	0.0613549	0.0741465	0.102928	0.120348	0.210603	0.208627	0.113849	0.225321	0.126559	0.17009	0.0783342	0.158659	0.0516987	0.049605	0.0793209	0.0479633	0.0799349	0.168514	0.146146	0.0428219
16:0p/14:0-PC	690.543	21.5511	0.00955176	0.0207214	0.0223224	0.0320833	0.0418128	0.0152202	0.029233	0.0687292	0.0330338	0.0369828	0.0385146	0.0108602	0.042568	0.0216476	0.054776	0.0587393	0.0547134	0.033482	0.0639023	0.0304911	0.0601179	0.082103	0.0343464	0.0279164	0.0346594	0.0589521	0.0679067	0.014233	0.035849	0.0537742	0.0107067	0.0572473	0.0810797	0.0555072	0.0873305	0.0433512	0.0573628	0.0234351	0.0536225	0.00282174	0.0154482	0.0288529	0.0171417	0.0343602	0.052148	0.0313721	0.00788425
16:0p/16:0-PC	718.575	24.12	0.22547	0.189743	0.148401	0.211415	0.202467	0.289132	0.335506	0.400251	0.216372	0.326842	0.257195	0.142045	0.302395	0.190017	0.333684	0.370886	0.401241	0.240322	0.350325	0.263683	0.344358	0.500803	0.302576	0.200489	0.260975	0.342845	0.326393	0.179601	0.199313	0.311397	0.100585	0.282571	0.365967	0.2968	0.417594	0.308726	0.325573	0.204932	0.353265	0.0513301	0.10302	0.171136	0.112555	0.176983	0.291874	0.183799	0.0645525
16:0p/18:1-PC	744.59	24.4	0.547943	0.548466	0.71141	0.854341	1.23133	0.816139	1.47998	1.59528	0.830928	1.00448	0.821942	0.406885	1.03295	0.621401	1.28899	1.53937	1.27559	0.872298	1.63304	0.95006	1.60274	1.92586	1.06256	0.966593	0.664723	1.30052	1.37809	0.479696	0.784052	1.02092	0.232879	1.25127	1.75831	1.09717	2.31495	0.831597	1.2232	0.697851	1.26513	0.0829944	0.35782	0.495928	0.31672	0.784477	1.41736	0.612056	0.285912
16:0p/18:2-PC	742.575	22.4918	0.0931594	0.0703718	0.0801086	0.0771842	0.277612	0.10943	0.147627	0.350565	0.102545	0.203636	0.211792	0.0609887	0.220347	0.0701629	0.163516	0.308456	0.248932	0.160173	0.18759	0.132398	0.268231	0.356314	0.160541	0.102596	0.0825975	0.262278	0.171476	0.0617735	0.0764743	0.173994	0.0505254	0.314135	0.239503	0.15871	0.280237	0.188352	0.186949	0.092497	0.220675	0.0213532	0.0618526	0.0670457	0.0378293	0.0674194	0.300505	0.161643	0.0822482
16:0p/20:4-PC	766.575	22.1544	0.355781	0.285782	0.302807	0.272553	0.833387	0.371575	0.62097	1.12622	0.483349	0.644839	0.516444	0.195126	0.750478	0.32152	0.621677	1.05001	0.836317	0.458697	0.624324	0.515493	0.641552	1.06202	0.390184	0.410097	0.55486	0.767712	0.547688	0.361296	0.319743	0.560728	0.116923	0.846626	0.945845	0.492047	1.06453	0.639232	0.74134	0.376469	0.697894	0.0876749	0.192131	0.325218	0.219333	0.409574	0.735577	0.504627	0.194939
16:0p/22:6-PC	790.575	21.6926	0.0300401	0.0374805	0.0367045	0.0367612	0.0992556	0.0282019	0.0764807	0.10934	0.054507	0.06273	0.0750444	0.0276253	0.0812818	0.042048	0.0977616	0.121434	0.0774664	0.0611332	0.0674511	0.0791362	0.113209	0.112405	0.0624552	0.0333922	0.0895474	0.121388	0.0669422	0.0317222	0.036542	0.0580669	0.0102614	0.0999085	0.138092	0.0564338	0.124601	0.0975274	0.0921272	0.0613791	0.0934241	0.00171318	0.0238635	0.0541506	0.019143	0.0428056	0.0961195	0.0647936	0.0220818
16:1/20:4-PC	780.554	19.3	0.0186378	0.0286287	0.0274952	0.0242955	0.0287312	0.0100802	0.0297209	0.0532524	0.036577	0.0442729	0.0289824	0.0304391	0.036074	0.0309482	0.0405145	0.0465442	0.026595	0.0121384	0.0310261	0.0253596	0.0227569	0.0640424	0.025568	0.0262174	0.0211348	0.0332053	0.0204226	0.0125747	0.0189373	0.0241362	0.0446949	0.0300653	0.0350281	0.0342321	0.0405158	0.0321827	0.0283555	0.0239342	0.0139143	0.0286045	0.0120292	0.0280739	0.0164013	0.00960839	0.0296696	0.0402036	0.0179005
18:0/18:1-PC	788.616	25.811	6.28263	8.11198	6.71564	7.10872	9.62684	8.26649	9.65079	11.6959	8.84198	8.73242	9.22453	7.57176	8.27455	7.55429	9.02468	10.2047	8.79087	4.52962	6.84296	9.77586	7.01	11.6155	6.46995	5.17804	8.85202	6.63777	4.68162	3.43271	3.81089	5.64977	7.23856	6.3462	6.57493	5.81257	6.25824	7.12013	9.49742	5.59368	4.48124	6.64364	2.86315	6.88155	3.40414	4.53498	6.51436	6.33246	2.55267
18:0/18:2-PC	786.601	23.7972	6.03084	4.33537	4.08073	4.04787	6.55132	2.53914	6.61752	12.9227	4.53867	6.35503	7.12836	4.97903	5.04058	3.27962	3.82396	6.33116	5.66338	3.87994	6.26728	3.93809	5.55839	6.18183	4.68219	3.60858	3.68969	5.94323	5.19529	1.65636	2.81443	5.22956	4.62539	6.70746	7.93159	4.43797	6.37768	4.26271	5.01514	3.5729	7.45487	2.62534	1.64747	3.10486	1.8984	1.78357	5.79373	8.31297	3.41906
18:0/20:2-PC	814.632	26.3272	0.18272	0.22427	0.21437	0.227691	0.266933	0.164296	0.337787	0.366688	0.264393	0.276406	0.250752	0.24753	0.234673	0.203265	0.293389	0.270448	0.240741	0.148928	0.210821	0.325857	0.206804	0.323129	0.248845	0.176045	0.201607	0.182777	0.13087	0.108502	0.132978	0.183908	0.256319	0.177546	0.205247	0.160798	0.202635	0.171408	0.297276	0.175233	0.135067	0.197179	0.0824844	0.190428	0.0961854	0.131996	0.210782	0.175536	0.0798144
18:0/20:3-PC	812.616	24.591	1.37073	1.0248	0.972088	1.14055	1.61779	0.883627	1.46102	4.14965	1.23919	1.14116	1.08271	1.05199	1.22364	0.722072	1.06787	1.62937	1.63897	0.769817	1.17369	0.915502	0.776565	1.33131	0.857903	1.14335	0.720035	1.07095	1.47283	0.314464	0.693061	1.26639	1.11342	1.25899	1.86561	1.451	1.64075	0.867824	1.15756	0.816275	1.36602	1.09479	0.418157	0.589151	0.673831	0.542379	0.861859	2.4069	0.440626
18:0/20:5-PC	808.585	22.1	0.455757	0.58048	0.385987	0.375334	0.554107	0.286112	0.516518	1.27945	0.458904	0.499177	0.567636	0.367582	0.501882	0.30475	0.453663	0.673839	0.523983	0.261857	0.453892	0.451322	1.19406	0.591797	0.351572	0.437347	0.281741	0.570304	0.390548	0.22281	0.344147	0.376673	0.417706	0.537341	1.18646	0.501521	1.01127	0.434553	0.516341	0.315264	0.355282	0.40019	0.205811	0.301288	0.311825	0.310502	0.480281	0.868819	0.197509
18:0/22:4-PC	838.632	25.4445	0.410924	0.409454	0.329749	0.34443	0.585111	0.40736	0.581467	0.811908	0.481432	0.459279	0.451619	0.311301	0.47995	0.347096	0.503526	0.602635	0.546795	0.236466	0.379314	0.468684	0.26288	0.641879	0.322086	0.351849	0.433849	0.35193	0.301715	0.188574	0.21143	0.328746	0.36989	0.302254	0.319347	0.329312	0.439078	0.311768	0.518311	0.211701	0.230289	0.399264	0.179947	0.320854	0.232256	0.295788	0.359441	0.474167	0.124143
18:0/22:5-PC	836.616	23.7358	0.386066	0.3895	0.301993	0.331822	0.654606	0.184785	0.512786	1.26835	0.315097	0.448396	0.470699	0.306665	0.362817	0.269584	0.338342	0.512308	0.458778	0.228245	0.339214	0.475827	0.496277	0.38496	0.336114	0.319485	0.263944	0.453137	0.366089	0.140592	0.231544	0.353729	0.385215	0.425135	0.643985	0.503927	0.959428	0.34133	0.464341	0.243169	0.396917	0.319398	0.136834	0.277869	0.185407	0.188295	0.33196	0.614519	0.126744
18:0/22:6-PC	834.601	22.9896	2.23733	3.1492	2.07254	1.83362	3.01794	2.44443	3.98818	3.74505	2.91462	2.37192	3.06374	2.92413	2.33523	2.07388	3.4097	2.84901	2.43174	1.51908	1.89287	2.97643	2.66555	3.0475	2.49846	1.78656	2.28751	2.59578	1.88338	0.821	1.28338	2.13355	2.1783	1.90739	3.4307	2.14112	2.98525	2.6801	2.37669	2.0762	1.94551	2.01693	0.920511	1.73478	0.962009	1.31908	2.14789	2.86696	0.768409
18:0e/18:2-PC	772.621	25.4603	0.0614198	0.050194	0.0677384	0.0611988	0.129755	0.0431395	0.0778417	0.142233	0.0592126	0.112078	0.0941695	0.0657914	0.0717583	0.0312135	0.0496983	0.0783091	0.0786675	0.0494404	0.0635139	0.080083	0.0643132	0.0840193	0.0706687	0.057209	0.026279	0.0609138	0.0927683	0.0125298	0.0262206	0.080122	0.0646386	0.0853567	0.0744487	0.0557734	0.0742873	0.0431867	0.0703452	0.0326901	0.0936716	0.0312822	0.0306758	0.0566495	0.0279988	0.0361174	0.099542	0.100062	0.045021
18:0e/20:4-PC	796.621	25.23	0.210962	0.177058	0.233749	0.195494	0.505306	0.183116	0.289193	0.676498	0.305029	0.416698	0.318172	0.203506	0.266483	0.17577	0.198915	0.323203	0.262979	0.169708	0.23812	0.272984	0.173079	0.348696	0.175926	0.253901	0.16256	0.215479	0.306564	0.0964527	0.139159	0.251384	0.228206	0.350229	0.300495	0.219513	0.390614	0.165065	0.288392	0.127391	0.280573	0.17864	0.102385	0.15811	0.144826	0.153206	0.310266	0.298048	0.118343
18:0p/18:1-PC	774.637	24.5	0.163916	0.145143	0.228383	0.231807	0.267886	0.142711	0.277599	0.321774	0.214482	0.309577	0.183294	0.250213	0.205843	0.145714	0.152061	0.22824	0.162097	0.131943	0.243095	0.222038	0.186191	0.263052	0.22008	0.166134	0.107555	0.156402	0.202402	0.0749978	0.110165	0.153079	0.182197	0.183158	0.229534	0.163272	0.216523	0.132372	0.178183	0.154739	0.196199	0.159861	0.0681854	0.122498	0.103333	0.112328	0.197419	0.162772	0.0764345
18:0p/20:4-PC	794.606	22.7552	0.555419	0.564109	0.793209	0.73216	1.48256	0.555064	0.831679	1.74233	0.820411	1.40242	0.957562	0.792545	0.884916	0.521404	0.578452	1.1612	0.800442	0.375204	0.811269	0.792654	0.599354	1.13999	0.529466	0.597955	0.639499	0.828619	0.679862	0.239708	0.387229	0.703225	0.904683	0.789851	0.980457	0.599231	1.20407	0.657055	0.748456	0.502372	0.832945	0.484583	0.194057	0.619521	0.345089	0.41994	0.941617	1.01025	0.297718
18:1/18:1-PC	786.601	23.3184	3.34963	4.00104	4.20119	4.16211	5.19195	2.92493	6.01072	6.6084	4.94239	5.24703	4.66664	4.10017	4.50595	3.97694	5.27228	5.78315	4.20007	2.42858	3.74716	5.52474	3.56488	6.34027	4.05333	3.14791	4.01029	3.94387	2.39076	1.75269	2.21013	3.2624	4.27338	3.31019	3.63842	3.19506	3.34696	3.1791	4.80953	3.15872	2.28025	3.5625	1.63307	3.39287	1.77917	2.60752	3.93493	3.75982	1.36784
18:1/18:2-PC	784.585	21.55	1.17291	0.940796	0.821098	0.970509	1.48348	0.349819	1.22888	2.28991	0.83994	1.41276	1.11691	0.991619	1.07217	0.684836	0.913276	1.18804	0.886088	0.707637	1.14969	0.794059	1.01255	1.25059	1.10034	0.71713	0.460612	1.06451	0.776325	0.362533	0.601368	0.899958	1.15815	1.25071	1.5043	0.816545	1.13214	0.717093	0.874642	0.730859	1.14044	0.543388	0.291439	0.551176	0.372705	0.39378	1.26714	1.55082	0.893034
18:1/20:3-PC	810.601	22.85	1.02182	0.898643	0.965605	0.891386	1.63362	0.911388	1.42525	2.34692	1.2926	1.37448	1.1551	0.754793	1.26794	0.891987	1.1836	1.78507	1.31077	0.528066	0.950254	1.31895	0.582135	1.85395	0.758521	0.988465	0.974027	1.06361	0.722149	0.437862	0.500417	0.858111	1.03802	0.831572	0.95815	0.869425	1.05752	0.748614	1.4371	0.537425	0.652083	0.974311	0.38797	0.845023	0.549773	0.750166	0.93977	1.3569	0.276585
18:1/20:4-PC	808.585	21.4	1.65663	1.82353	1.99474	1.54103	2.92099	0.79317	2.57539	4.71938	2.30423	2.41287	2.35363	1.64822	2.18522	1.52142	1.90893	2.62703	1.8769	1.04947	1.82674	2.20357	2.13789	2.77608	1.86805	1.65691	1.38288	2.18747	1.31747	0.877866	1.2676	1.63175	2.03289	2.27776	3.0986	1.94925	3.39909	1.67899	2.11966	1.36645	1.3951	1.64273	0.689789	1.51415	0.950997	1.17363	1.91879	2.62783	0.862836
18:1/22:6-PC	832.585	20.8516	2.19357	3.12383	2.06643	1.83213	3.01805	1.87633	4.06383	3.74204	2.90452	2.36567	3.06782	2.64386	2.33868	2.01942	3.40503	2.87271	2.36314	1.52014	1.94622	2.96805	2.66433	3.07278	2.48599	1.81626	2.28692	2.5927	1.89088	0.831062	1.2956	2.13734	2.16026	1.90765	3.44038	2.11798	2.98811	2.67888	2.37769	2.06761	1.94981	2.04039	0.923539	1.72878	0.960336	1.31951	2.00824	2.86299	0.76317
18:1p/20:4-PC	792.59	22.1	0.0868575	0.114969	0.093944	0.0933589	0.163128	0.0755744	0.171923	0.200126	0.125845	0.136911	0.141606	0.167367	0.10523	0.0962189	0.105531	0.139206	0.0985869	0.06131	0.118689	0.149454	0.151629	0.136307	0.107956	0.0748941	0.105501	0.147779	0.106919	0.0330712	0.0777505	0.103273	0.105851	0.118817	0.229859	0.0725164	0.170769	0.121148	0.14133	0.118992	0.120618	0.0870005	0.0422378	0.101584	0.0431187	0.0601833	0.135387	0.138355	0.0502909
18:2/18:2-PC	782.569	20	0.199326	0.174077	0.101038	0.126053	0.184989	0.0687187	0.200633	0.357065	0.0773844	0.223219	0.163504	0.154403	0.13404	0.0585109	0.096951	0.189931	0.121661	0.113621	0.131695	0.0876128	0.168289	0.128248	0.166511	0.105095	0.0448583	0.179725	0.116398	0.0330789	0.0701896	0.1281	0.0943936	0.203225	0.197564	0.127355	0.186321	0.0972387	0.140315	0.0886601	0.193233	0.0516259	0.0619904	0.0394371	0.0383988	0.0351774	0.213501	0.365693	0.202325
18:2/18:3-PC	780.554	18.8	0.101312	0.239816	0.101946	0.10855	0.121379	0.0605054	0.0904372	0.258837	0.103737	0.0979408	0.209896	0.14986	0.105496	0.0749516	0.117351	0.148852	0.118773	0.0612773	0.1401	0.133576	0.730939	0.124888	0.150121	0.0596113	0.0672055	0.225092	0.0829525	0.028929	0.10246	0.0686858	0.0911125	0.192527	0.640499	0.145513	0.375739	0.267653	0.0820156	0.175011	0.101016	0.0768795	0.0365828	0.0635389	0.0277546	0.0491034	0.0969457	0.118891	0.151896
18:2/20:4-PC	806.569	19.84	0.0848434	0.0526975	0.0512895	0.0393351	0.123476	0.0319668	0.081974	0.139928	0.0569649	0.109544	0.0693975	0.0533412	0.0709844	0.0379262	0.0517448	0.102537	0.06684	0.0361672	0.0632212	0.0553899	0.0749337	0.0781702	0.051394	0.0593675	0.031162	0.0641407	0.0454708	0.023901	0.0342439	0.0542917	0.0577559	0.0916744	0.106261	0.0612514	0.0796888	0.0477939	0.0494196	0.0380531	0.0662142	0.0327226	0.0222075	0.0273528	0.026696	0.0275549	0.0770976	0.121817	0.0520746
16:0-LdMePE	480.31	10.4897	0.0367098	0.0302404	0.0796182	0.0533942	0.055504	0.0461641	0.0271674	0.0871549	0.0360745	0.0837445	0.0454503	0.0536686	0.0350258	0.0100729	0.034019	0.0433274	0.0255367	0.00903333	0.0270298	0.0406538	0.0104555	0.0292966	0.0191451	0.0160278	0.0193952	0.0375759	0.083538	0.056028	0.0229592	0.114856	0.0699053	0.0373686	0.0967225	0.013888	0.057508	0.0279559	0.0528046	0.0158671	0.0805334	0.077359	0.0220066	0.0377838	0.0206834	0.0107969	0.0255679	0.0329376	0.0104227
18:0-LdMePE	508.341	11.8896	0.0121353	0.0102919	0.0223403	0.0136964	0.021432	0.0198067	0.0149307	0.0593366	0.0132621	0.0341685	0.0184359	0.0130788	0.0128432	0.00349515	0.0160418	0.0291331	0.0175282	0.00753279	0.0174047	0.014736	0.0112327	0.0159643	0.0101884	0.00984962	0.0110633	0.0219823	0.0258286	0.0142618	0.00680249	0.0282143	0.0106958	0.00800654	0.025502	0.0101824	0.033576	0.0189645	0.0228142	0.00742368	0.027706	0.0130599	0.00356969	0.00641515	0.00603268	0.00369468	0.00869959	0.0154587	0.00141868
18:1-LdMePE	506.325	10.8103	0.0727113	0.0508049	0.110554	0.0938708	0.035277	0.0328236	0.0635891	0.0404183	0.0278913	0.0943397	0.0388022	0.111847	0.0287717	0.0187664	0.00659656	0.0119456	0.0112151	0.00423101	0.00744051	0.0284196	0.00482656	0.0213781	0.0316244	0.0275338	0.0115107	0.00991866	0.0155202	0.00953827	0.0177228	0.0199208	0.110637	0.011208	0.0505314	0.0131621	0.0318295	0.0162727	0.0153337	0.0215417	0.0436578	0.068099	0.0268896	0.0477153	0.0281844	0.016998	0.0403055	0.0409986	0.0196767
16:0-LPE	452.278	10.7723	0.0258692	0.0379488	0.0464727	0.0386771	0.0283509	0.0278694	0.0304926	0.0341459	0.0138291	0.0450249	0.033392	0.0599048	0.0209219	0.0147579	0.00721261	0.014064	0.00731511	0.00501807	0.00574174	0.0223648	0.00390007	0.019943	0.0218407	0.0126572	0.0178161	0.00703657	0.00963625	0.00458228	0.00593845	0.0138869	0.0519397	0.0168207	0.0173551	0.00845121	0.0156252	0.0150955	0.0110683	0.0144149	0.0180334	0.0362597	0.00474094	0.0247783	0.018193	0.0117333	0.0187662	0.0221792	0.0260861
18:0-LPE	480.31	12.1105	0.0259593	0.0336535	0.0357898	0.02802	0.0359656	0.0495617	0.0242481	0.0417872	0.0218951	0.0354288	0.0328781	0.0209757	0.0205547	0.0168279	0.0301087	0.0433035	0.0299643	0.0162495	0.0193246	0.0270452	0.0187051	0.0313788	0.0182744	0.015148	0.0440764	0.0243581	0.0235027	0.0166347	0.0113665	0.0322989	0.029926	0.0270697	0.0241141	0.0269666	0.0326013	0.0390262	0.0333067	0.0235896	0.0183759	0.0214194	0.0102209	0.0159386	0.0102912	0.00978568	0.0164237	0.0163482	0.00736505
18:1-LPE	478.294	11	0.424862	0.342549	0.621451	0.50346	0.220447	0.195193	0.257214	0.22976	0.25827	0.500364	0.321885	0.731388	0.185255	0.166242	0.0700371	0.0953899	0.0669141	0.0599085	0.065904	0.215748	0.070661	0.158445	0.205737	0.192327	0.116647	0.099894	0.0642563	0.0357444	0.0886063	0.101745	0.768735	0.0698587	0.133403	0.0899102	0.125646	0.10761	0.114461	0.183045	0.125166	0.529862	0.114318	0.431215	0.195147	0.146865	0.249219	0.305748	0.221262
18:2-LPE	476.278	10.3	0.119167	0.0340914	0.0743596	0.06274	0.0412619	0.0201353	0.045923	0.0330086	0.0227718	0.0978795	0.0579577	0.138592	0.0207842	0.0132576	0.00332164	0.0184982	0.0101185	0.0100433	0.0115167	0.0112423	0.00550346	0.0173634	0.0402281	0.0290931	0.00403747	0.0126619	0.0201617	0.0016765	0.00685985	0.0148884	0.112361	0.0107202	0.0479496	0.0108073	0.0201223	0.00762171	0.00736752	0.010191	0.0862065	0.0551922	0.0201118	0.0483224	0.0326848	0.0164477	0.0528803	0.116653	0.0420218
20:4-LPE	500.278	10.0678	1.2301	0.781206	1.34018	0.820885	0.631368	0.384167	0.622908	0.431224	0.524085	1.44558	0.747839	1.66895	0.420568	0.34835	0.11439	0.196904	0.149011	0.122045	0.147517	0.38546	0.106365	0.355764	0.490913	0.383793	0.223086	0.141645	0.126144	0.066494	0.182222	0.198606	2.01646	0.146958	0.411982	0.184558	0.307253	0.236198	0.169423	0.254293	0.547482	1.38293	0.223672	0.88056	0.491187	0.286266	0.580845	0.803432	0.556343
22:4-LPE	528.31	10.8083	0.378882	0.374533	0.409579	0.358614	0.226281	0.232655	0.297202	0.201437	0.242157	0.450058	0.323407	0.569898	0.208646	0.166728	0.0629987	0.0821736	0.0682649	0.0430871	0.0455641	0.199917	0.0377727	0.174103	0.183683	0.179201	0.149337	0.0588089	0.0397248	0.0241533	0.0672221	0.0795589	0.738467	0.0353268	0.0932297	0.0672282	0.0694609	0.117291	0.0921275	0.105313	0.0638225	0.611145	0.0790494	0.355904	0.186586	0.12679	0.202114	0.274136	0.196826
22:5-LPE	526.294	10.419	0.239024	0.189522	0.243485	0.175509	0.110209	0.107753	0.179747	0.119016	0.125626	0.251294	0.189505	0.398126	0.09848	0.0802405	0.0245165	0.0378629	0.0292182	0.0116971	0.0249803	0.109331	0.0308758	0.08771	0.122099	0.119923	0.0577122	0.0265902	0.0158751	0.0103859	0.0366066	0.0325192	0.464557	0.0153584	0.0893552	0.0325582	0.0547134	0.0623683	0.0334676	0.0812392	0.0740437	0.230855	0.0419518	0.209015	0.116181	0.0638429	0.102431	0.223295	0.15961
22:6-LPE	524.278	9.98915	2.20123	2.22948	2.49536	2.21508	1.28178	1.29125	2.06691	1.13205	1.53124	2.81837	2.32434	4.70902	1.20492	1.01878	0.420275	0.494251	0.378593	0.283486	0.225986	1.33636	0.288418	1.02737	1.33881	1.05767	0.867204	0.377969	0.189754	0.154121	0.395727	0.485573	4.93342	0.215593	0.538469	0.407851	0.329212	0.702969	0.57715	0.879673	0.311994	3.30394	0.553081	2.67535	1.05736	0.76005	1.25899	1.84421	0.738999
16:0/16:0-dMePE	718.539	22.7832	0.0531819	0.0645748	0.0622925	0.0674014	0.0939466	0.114526	0.0921284	0.0600533	0.0465635	0.128906	0.108765	0.0864148	0.0630602	0.0756096	0.0888787	0.0855057	0.0667417	0.0555339	0.0520815	0.092196	0.0565198	0.134774	0.0378109	0.0460843	0.121816	0.0583332	0.0583067	0.037025	0.0390035	0.067633	0.0813328	0.0537878	0.037181	0.0760017	0.0550533	0.0574352	0.105698	0.0575849	0.0425257	0.0502019	0.0323214	0.0856657	0.0326163	0.0335356	0.0469836	0.0243469	0.0189167
16:0/18:1-dMePE	744.555	23.038	0.323466	0.353527	0.360681	0.354853	0.414727	0.31034	0.476995	0.54489	0.40362	0.509138	0.413325	0.359443	0.396077	0.379151	0.47328	0.468943	0.387246	0.24768	0.321698	0.441613	0.34827	0.539436	0.267364	0.292698	0.390815	0.362917	0.214447	0.185982	0.187996	0.31659	0.401643	0.257895	0.261028	0.264478	0.274897	0.313911	0.4658	0.348435	0.229543	0.264412	0.148264	0.314119	0.17576	0.235981	0.273559	0.279839	0.15184
16:0/18:2-dMePE	742.539	21.3163	0.0577875	0.0470239	0.0687546	0.0618407	0.0807062	0.0268983	0.0689947	0.150643	0.0413747	0.0908105	0.0750156	0.0401495	0.0477068	0.0235546	0.0456557	0.0861181	0.0402182	0.0302235	0.0580637	0.0444633	0.0344618	0.0980228	0.0287541	0.028621	0.0111166	0.0457786	0.0511297	0.012562	0.032365	0.052203	0.0600024	0.0672735	0.0709819	0.0368255	0.0408606	0.0531904	0.0504394	0.0321064	0.0643685	0.0230769	0.0162784	0.044111	0.0211465	0.0141494	0.0662673	0.0576685	0.0437328
16:0/20:4-dMePE	766.539	21.183	0.031491	0.0569893	0.0706866	0.0294774	0.0670103	0.045219	0.0528193	0.100402	0.0611558	0.0250699	0.0859688	0.0513808	0.0526186	0.0284916	0.0580402	0.0920817	0.0477555	0.0276035	0.0343221	0.0480833	0.0339478	0.0685344	0.0362496	0.0220526	0.0261653	0.045726	0.0306058	0.0190364	0.00636367	0.0398642	0.047437	0.0606779	0.0587147	0.0349822	0.0824582	0.0493863	0.0696279	0.0145451	0.0337423	0.0386001	0.0198896	0.0283369	0.0171308	0.0188291	0.0507538	0.0451852	0.0184166
16:0e/22:4-dMePE	780.591	27.9716	0.085881	0.129162	0.136472	0.132986	0.250003	0.202128	0.225675	0.283458	0.273492	0.232967	0.231473	0.175217	0.183763	0.147405	0.141942	0.19598	0.182364	0.0897967	0.137363	0.199394	0.0813948	0.315083	0.160271	0.161228	0.194377	0.101244	0.0653516	0.0501824	0.0542005	0.117497	0.147348	0.0634168	0.0454177	0.0987765	0.0599972	0.1168	0.211471	0.0692053	0.0157949	0.125588	0.0517293	0.140032	0.0697071	0.110902	0.17005	0.161316	0.0621827
16:0p/18:1-dMePE	728.56	27.939	0.0120792	0.00713605	0.0241302	0.0113527	0.0278433	0.0297924	0.0149088	0.0220974	0.0177098	0.0326143	0.0375787	0.00909507	0.0301311	0.0111834	0.00752804	0.112185	0.037985	0.00859938	0.0226805	0.0385228	0.0103986	0.020285	0.0137513	0.0176326	0.0355112	0.0466635	0.0117599	0.00785486	0.0122389	0.0157653	0.0103911	0.0137592	0.0175439	0.0166347	0.0324947	0.00464431	0.0883297	0.0175114	0.037252	0.00306602	0.0048471	0.0298195	0.0101407	0.0339065	0.0796517	0.0163703	0.0177973
16:1/20:4-dMePE	764.524	19.064	0.0498546	0.0542884	0.0661378	0.0657507	0.0574006	0.0289133	0.0520657	0.056462	0.0683325	0.0866507	0.0595173	0.0960484	0.0330898	0.0344709	0.0189557	0.0238859	0.0177124	0.012595	0.0225853	0.0664206	0.0139966	0.0629973	0.0394605	0.0370824	0.0236977	0.0132646	0.009753	0.00834578	0.0134388	0.0229265	0.17401	0.015666	0.0396006	0.0206185	0.0201073	0.0239944	0.0356766	0.025328	0.0220827	0.0859469	0.0175847	0.0559227	0.0352847	0.0233309	0.0469659	0.0495166	0.0234411
16:1/22:6-dMePE	788.524	18.74	0.0662873	0.0633129	0.0845204	0.102834	0.0869343	0.0332794	0.0885892	0.0824716	0.0707836	0.093353	0.0712343	0.126886	0.0527736	0.0495691	0.0340727	0.0358816	0.0221032	0.022051	0.0234924	0.0790733	0.0200997	0.0766798	0.0604022	0.0466821	0.0412361	0.016368	0.0116316	0.0121011	0.0131212	0.0307833	0.207981	0.0132078	0.0238231	0.0219335	0.0156525	0.0285073	0.045427	0.0421286	0.00196765	0.116587	0.0227749	0.0801643	0.0490782	0.0316279	0.0671219	0.0762113	0.0291023
16:1p/18:1-dMePE	726.544	25.242	0.101621	0.193047	0.209725	0.236358	0.329194	0.174983	0.259416	0.523717	0.367045	0.29934	0.332467	0.156441	0.264408	0.220593	0.324757	0.530914	0.306635	0.217094	0.329179	0.405066	0.339643	0.56867	0.196807	0.203457	0.293408	0.449224	0.212761	0.121293	0.126734	0.283774	0.0762436	0.210143	0.163657	0.211603	0.291923	0.215987	0.549304	0.0978233	0.150563	0.0167411	0.139526	0.2966	0.0874554	0.239198	0.361532	0.243134	0.0806458
18:0/18:2-dMePE	770.571	23.841	0.0175589	0.024588	0.0161039	0.0143814	0.0374162	0.0118395	0.0245747	0.0438837	0.013664	0.0329432	0.0455062	0.0256157	0.0254757	0.0140289	0.0190738	0.0320338	0.028725	0.0230798	0.0221725	0.0223342	0.015333	0.0205517	0.0190635	0.0128217	0.0097022	0.019603	0.0141271	0.00386338	0.00625885	0.020717	0.0302456	0.0167409	0.0189166	0.0166959	0.0250639	0.0124855	0.0258778	0.0143081	0.0280742	0.011285	0.00257307	0.0082665	0.00902437	0.00630645	0.016418	0.0208141	0.0167644
16:0/18:1-PE	716.524	23.0782	0.171014	0.155662	0.161518	0.174146	0.145234	0.410546	0.12734	0.169487	0.151644	0.210576	0.262083	0.157306	0.166753	0.145215	0.11823	0.192694	0.156247	0.154454	0.151225	0.191964	0.116857	0.197688	0.104271	0.108003	0.190983	0.185522	0.0784358	0.0692351	0.0965395	0.125831	0.21431	0.0874455	0.0675003	0.0926751	0.103148	0.13239	0.229935	0.111455	0.120756	0.207982	0.0567614	0.14413	0.0707632	0.090523	0.151587	0.144229	0.897755
16:0/18:2-PE	714.508	21.8173	0.0234139	0.0188099	0.0136262	0.0146081	0.0316122	0.00893905	0.0166411	0.0555412	0.015318	0.0285476	0.0257618	0.0173251	0.0170527	0.012496	0.00663193	0.028838	0.0120251	0.00961638	0.0271788	0.019317	0.0124603	0.0335354	0.0372262	0.00987769	0.006813	0.0295289	0.0321474	0.00471786	0.0131531	0.0250918	0.0421664	0.0207765	0.0304184	0.0131225	0.0215034	0.0139226	0.0265335	0.00999315	0.0414877	0.0146942	0.00768022	0.00885749	0.00995805	0.00685212	0.024914	0.0355136	0.166214
16:0/20:4-PE	738.508	21.3927	0.0806078	0.082085	0.0875946	0.0718735	0.143084	0.0675149	0.0930505	0.184718	0.0993788	0.144506	0.122493	0.0724911	0.0882855	0.0745385	0.0572259	0.126587	0.0888961	0.0541118	0.0872879	0.117521	0.0565684	0.160453	0.0946332	0.0738949	0.0818166	0.107238	0.0649146	0.0326948	0.0499767	0.0765688	0.109401	0.0629646	0.0806519	0.0670599	0.0843524	0.0711839	0.104623	0.0406131	0.100838	0.0819299	0.0377508	0.0825944	0.0429941	0.0496739	0.10534	0.0950948	0.317218
16:0/22:4-PE	766.539	23.3086	0.042991	0.070279	0.0429204	0.0511555	0.0828319	0.0637262	0.0893543	0.0966088	0.0803502	0.0755381	0.0901742	0.0520153	0.0689117	0.0581504	0.0612509	0.0851302	0.0905886	0.0335806	0.0560431	0.0934982	0.0393159	0.120707	0.056784	0.0445341	0.0840264	0.0652287	0.0300785	0.0210728	0.0212228	0.0437353	0.054212	0.022902	0.025632	0.0321992	0.02826	0.051291	0.084764	0.0243508	0.0142322	0.0668173	0.0201071	0.0649351	0.0313182	0.0427782	0.0628736	0.0642744	0.0819092
16:0/22:6-PE	762.508	21.2091	0.369672	0.709954	0.492501	0.566024	0.601615	1.03358	0.806433	0.686941	0.622122	0.93389	0.947181	0.719811	0.525769	0.489222	0.647008	0.766733	0.625717	0.300419	0.399995	0.976448	0.526599	1.24925	0.572268	0.355422	0.779466	0.719958	0.222381	0.154652	0.199011	0.352278	0.536377	0.195852	0.220101	0.413228	0.245663	0.483018	0.920194	0.312643	0.198501	0.556492	0.192026	0.564964	0.201435	0.383754	0.535845	0.471763	0.263159
16:0e/22:4-PE	752.56	25.0387	0.0353235	0.0481455	0.0709444	0.0990279	0.0914274	0.101299	0.177577	0.241913	0.13836	0.209037	0.176814	0.0741946	0.127412	0.0534898	0.062116	0.128108	0.11517	0.0501766	0.104206	0.140508	0.0351832	0.191409	0.103858	0.0787655	0.113924	0.0721732	0.0598365	0.0222373	0.028942	0.0789862	0.103319	0.0414508	0.0421019	0.0345834	0.058302	0.0678416	0.155708	0.03765	0.031768	0.113264	0.0171153	0.0935367	0.037088	0.0877588	0.132741	0.110175	0.0406088
16:0e/22:6-PE	748.529	22.5	0.1779	0.322478	0.316333	0.346162	0.491087	0.244543	0.585715	0.650039	0.490723	0.522225	0.51087	0.468397	0.339752	0.336701	0.370959	0.368254	0.37427	0.2066	0.419807	0.525832	0.372667	0.587978	0.37061	0.290516	0.340669	0.284376	0.277054	0.162188	0.127538	0.292331	0.292542	0.155513	0.346032	0.231548	0.430629	0.296334	0.524506	0.225948	0.447157	0.314501	0.139475	0.331552	0.145855	0.265025	0.360458	0.354928	0.126658
16:0p/18:1-PE	700.529	24.9649	0.177564	0.209906	0.248484	0.277724	0.421267	0.242917	0.323924	0.665751	0.430158	0.392837	0.44778	0.217724	0.343019	0.264815	0.347345	0.609117	0.385805	0.294508	0.475123	0.4713	0.449548	0.698357	0.334406	0.253607	0.322263	0.53061	0.287088	0.146707	0.168254	0.353022	0.116464	0.287907	0.233174	0.283938	0.380524	0.276982	0.639708	0.236188	0.212981	0.0444544	0.174402	0.309503	0.115135	0.301294	0.453328	0.258995	0.123215
16:0p/20:4-PE	722.513	22.7285	0.27563	0.216708	0.344412	0.255676	0.674077	0.211758	0.393821	0.749225	0.489179	0.528891	0.489962	0.209081	0.449193	0.312741	0.392175	0.672978	0.623436	0.409386	0.795772	0.439729	0.488513	0.837321	0.472532	0.370458	0.3181	0.513315	0.494866	0.250163	0.269886	0.499164	0.15005	0.44583	0.589531	0.332984	0.763652	0.417063	0.473405	0.214282	0.707959	0.0408393	0.205605	0.304042	0.180482	0.310962	0.641013	0.468052	0.253503
16:0p/22:6-PE	746.513	22.2428	0.385202	0.601745	0.519867	0.593907	1.19676	0.811885	1.14748	1.80479	1.20759	1.04933	1.36038	0.499196	1.08863	0.82361	1.30026	1.76258	1.28281	0.799951	1.09735	1.48605	1.26209	2.25321	0.974799	0.724667	1.20968	1.23334	0.633562	0.458275	0.393088	0.978828	0.267567	0.617393	0.683836	0.866965	0.779278	0.980688	1.95067	0.559425	0.461521	0.0933395	0.428248	0.837523	0.302237	0.811191	1.30873	0.869168	0.25488
18:0/18:2-PE	742.539	24.2946	0.0862043	0.0711534	0.0376172	0.0418677	0.149724	0.0362738	0.0553922	0.205061	0.0477303	0.0729773	0.0747234	0.0522884	0.0465324	0.0336566	0.0305754	0.0795439	0.0665851	0.0314364	0.0851951	0.0606073	0.045846	0.0854675	0.0775071	0.0297558	0.0286838	0.0836708	0.0863331	0.0166918	0.0373085	0.0590553	0.0880301	0.0546879	0.0886744	0.0453322	0.0578278	0.036085	0.0655364	0.0276542	0.109043	0.0318891	0.02132	0.0408318	0.0201807	0.0217755	0.0695698	0.103444	0.10592
18:0/20:3-PE	768.555	25.106	0.0241855	0.0501934	0.0282826	0.0443782	0.0546358	0.0657704	0.0605559	0.0837871	0.0463683	0.0530788	0.0660567	0.0440149	0.042458	0.0356158	0.0491305	0.069797	0.0599585	0.0176757	0.0424891	0.0690379	0.0418063	0.091695	0.0595587	0.0243518	0.0913982	0.0408048	0.0262763	0.00812819	0.0151257	0.0298205	0.0453633	0.0159184	0.0183566	0.0348828	0.0164625	0.044822	0.0606276	0.0215772	0.0208559	0.0305753	0.0117303	0.0539546	0.0130572	0.0227599	0.0404672	0.0487501	0.0230717
18:0/20:4-PE	766.539	24.0427	0.582396	0.836335	0.617355	0.622862	0.978448	0.901903	1.01644	1.3154	0.975269	0.954337	1.14747	0.718397	0.811229	0.744132	0.682178	1.15089	0.997549	0.391658	0.687129	1.06982	0.584104	1.53831	0.796302	0.526485	1.03127	0.726723	0.406736	0.265766	0.317753	0.534722	0.750625	0.378914	0.431373	0.529412	0.456192	0.628688	0.901318	0.36248	0.422007	0.635776	0.25575	0.832901	0.314509	0.469733	0.803866	0.691955	0.437971
18:0/22:4-PE	794.571	25.992	0.197898	0.457013	0.278799	0.290909	0.42434	0.488253	0.518244	0.435173	0.444324	0.469669	0.526254	0.411758	0.401508	0.360919	0.415164	0.564167	0.562141	0.168187	0.28397	0.477833	0.225822	0.737114	0.336991	0.212188	0.581572	0.260955	0.131461	0.0966789	0.110764	0.206021	0.293281	0.106485	0.115927	0.208352	0.137487	0.294597	0.370368	0.132104	0.0317096	0.323775	0.0971872	0.321949	0.131617	0.211833	0.285105	0.27059	0.0865941
18:0/22:5-PE	792.555	25.17	0.10321	0.108309	0.0908275	0.144024	0.171734	0.20254	0.207559	0.327018	0.193415	0.203265	0.186311	0.088962	0.212123	0.139914	0.207557	0.256726	0.257894	0.0852621	0.0917668	0.165665	0.045669	0.336669	0.0803025	0.138564	0.222868	0.0989017	0.0679427	0.0684002	0.064213	0.110243	0.169701	0.0609089	0.0284476	0.0930305	0.043564	0.0600265	0.284489	0.0306346	0.0122457	0.174262	0.0628026	0.134627	0.115158	0.196314	0.143498	0.247777	0.044394
18:0/22:6-PE	790.539	23.555	2.33771	3.53856	2.21	2.88579	2.13494	7.41304	3.39624	2.35554	2.36944	3.39842	5.36785	2.97052	3.12713	2.30222	3.04239	3.81392	2.95336	2.69416	2.01805	3.64707	2.17071	4.69143	2.364	1.86073	4.85538	2.90755	0.983344	0.952844	1.34146	2.11438	2.81132	1.01905	0.819894	1.51684	1.11454	2.46881	5.01729	1.87773	0.569651	3.37328	0.837745	2.5288	1.10477	1.72694	2.15897	2.34911	0.878584
18:0e/20:4-PE	752.56	25.8604	0.0283075	0.0402899	0.0608934	0.0461004	0.108524	0.03614	0.0574161	0.0895506	0.0857621	0.0989171	0.0802261	0.0622027	0.0593954	0.0324302	0.033406	0.0966143	0.0684323	0.0351125	0.0510354	0.058272	0.0389924	0.165869	0.0448166	0.0424828	0.0404557	0.051107	0.04438	0.00833948	0.0180718	0.0406665	0.0428786	0.0348644	0.0431757	0.0404109	0.0419777	0.0324485	0.062316	0.0207157	0.0816895	0.0321269	0.024543	0.0458485	0.0228545	0.0356944	0.0786864	0.0774808	0.0475624
18:0e/22:4-PE	780.591	27.9834	0.085881	0.129162	0.136472	0.132986	0.250003	0.202128	0.225675	0.283458	0.273492	0.232967	0.231473	0.175217	0.183763	0.147405	0.141942	0.19598	0.182364	0.0897967	0.137363	0.199394	0.0813948	0.315083	0.160271	0.161228	0.194377	0.101244	0.0653516	0.0501824	0.0542005	0.117497	0.147348	0.0634168	0.0454177	0.0987765	0.0599972	0.1168	0.211471	0.0692053	0.0157949	0.125588	0.0517293	0.140032	0.0697071	0.110902	0.17005	0.161316	0.0621827
18:0e/22:6-PE	776.56	25.2483	0.251366	0.554715	0.457944	0.505813	0.720394	0.549954	0.921988	0.960443	0.862505	0.738453	0.858127	0.579581	0.583985	0.554476	0.550965	0.650975	0.554865	0.355413	0.447745	0.736477	0.384958	1.03646	0.479196	0.48184	0.636018	0.376147	0.261532	0.164827	0.199308	0.390864	0.488093	0.205218	0.17141	0.374839	0.228611	0.401283	0.706935	0.303731	0.10621	0.390625	0.197087	0.557097	0.220367	0.391986	0.551002	0.524744	0.173418
18:0p/18:1-PE	728.56	27.9305	0.0523791	0.091691	0.0901026	0.092409	0.177553	0.141915	0.111272	0.253031	0.176827	0.150201	0.16971	0.073385	0.128226	0.106865	0.15203	0.244661	0.170105	0.108269	0.183679	0.166413	0.163828	0.247007	0.129565	0.105471	0.150259	0.202925	0.105636	0.0622857	0.0668098	0.124391	0.037606	0.112542	0.0771041	0.0958449	0.133577	0.110264	0.265702	0.0832542	0.0788753	0.00827683	0.0695714	0.121771	0.0399195	0.103768	0.188158	0.115786	0.0503257
18:0p/18:2-PE	726.544	25.7186	0.034859	0.0203861	0.0316407	0.0195077	0.0832333	0.0224624	0.0507827	0.126038	0.0359763	0.0572791	0.0909928	0.0273901	0.0470421	0.0228803	0.0382628	0.0915431	0.115766	0.0692023	0.134783	0.0234282	0.0688695	0.0935277	0.06283	0.0461695	0.0155299	0.0785112	0.0899452	0.0133927	0.026959	0.0619045	0.0018675	0.0879245	0.0740054	0.0405856	0.0695946	0.029166	0.0799609	0.0160024	0.150563	0.0112349	0.0355263	0.0276493	0.00999108	0.0251719	0.101496	0.0914405	0.0204193
18:0p/20:3-PE	752.56	26.4663	0.0115691	0.0114203	0.0148319	0.019524	0.0220512	0.0456121	0.0200381	0.0543915	0.0196823	0.030171	0.0467115	0.00877234	0.0260007	0.0152141	0.0221052	0.0507787	0.0710313	0.0286636	0.0975158	0.0197407	0.0202109	0.049581	0.0285281	0.0212314	0.0263385	0.0332415	0.0400882	0.00213516	0.011421	0.0275375	0.00356912	0.0295601	0.0217471	0.0272366	0.0318978	0.0188182	0.0456624	0.00627041	0.0467229	0.000459284	0.00894476	0.012023	0.00582834	0.011782	0.0320021	0.0431352	0.0104085
18:0p/20:4-PE	750.544	25.3841	0.441428	0.575524	0.597484	0.448425	1.52751	0.725239	0.931708	1.55724	1.098	1.0718	1.25816	0.503084	0.933522	0.697646	0.968748	1.70708	1.37829	0.681496	1.32663	1.07093	0.928227	2.0004	0.810228	0.749214	1.00626	1.02466	0.784483	0.399344	0.398981	0.742607	0.257338	0.835559	0.765085	0.696479	1.02376	0.773199	1.34543	0.405207	1.07812	0.0781817	0.370902	0.627502	0.279956	0.600916	1.17949	0.774343	0.359056
18:0p/20:5-PE	748.529	23.7269	0.037938	0.0564189	0.0523919	0.0566643	0.0890675	0.076853	0.079193	0.171739	0.102004	0.100513	0.152155	0.0462026	0.0987307	0.0531053	0.100514	0.149395	0.122544	0.113169	0.159852	0.0939574	0.305981	0.152595	0.128454	0.0793721	0.0809874	0.137148	0.0909729	0.0533483	0.0531331	0.0812899	0.021746	0.0736958	0.131442	0.0698755	0.16031	0.0741691	0.130238	0.0294042	0.0914291	0.00308878	0.0350506	0.0540617	0.0368772	0.087719	0.137448	0.126619	0.0293948
18:0p/22:4-PE	778.576	27.4497	0.14101	0.293502	0.230007	0.23031	0.510359	0.465142	0.450841	0.757333	0.486699	0.370403	0.520922	0.211543	0.470321	0.338726	0.492783	0.819848	0.676691	0.258851	0.413912	0.525378	0.312048	1.09481	0.34677	0.292021	0.703262	0.362179	0.214012	0.166743	0.134626	0.310834	0.0875794	0.19613	0.135596	0.297108	0.214136	0.39837	0.355092	0.148803	0.0745233	0.0411841	0.141704	0.289221	0.114117	0.291723	0.432689	0.309336	0.0985011
18:0p/22:5-PE	776.56	26.2162	0.0658089	0.0625234	0.0499465	0.0860684	0.114487	0.218174	0.126981	0.301883	0.166494	0.169402	0.162224	0.0372444	0.184076	0.0999237	0.167858	0.248495	0.21453	0.125192	0.110904	0.126236	0.0654079	0.276217	0.0774314	0.158626	0.129037	0.105745	0.0789285	0.0889274	0.0684194	0.145091	0.0392316	0.0819078	0.0375201	0.0930729	0.0675821	0.0545909	0.267602	0.0175193	0.0326163	0.01061	0.0585987	0.0855544	0.0649256	0.151373	0.170497	0.196995	0.0259744
18:0p/22:6-PE	774.544	24.7742	1.09024	2.02975	1.44555	1.68364	3.67059	2.80867	3.96416	4.46665	3.83537	2.82496	4.22242	1.9328	3.43047	2.64447	4.64718	5.55815	4.59028	2.3424	2.73794	4.27299	3.6336	6.83263	3.16868	2.26274	4.55789	2.79966	1.50734	1.35227	1.25939	2.68613	0.773007	1.57179	1.08772	2.40711	1.55006	3.01314	2.55683	1.57821	0.533493	0.291058	1.32106	2.38288	0.819198	2.092	3.06159	2.2713	0.608846
18:1/18:1-PE	742.539	23.728	0.172596	0.232069	0.230502	0.245611	0.217032	0.166885	0.260946	0.526098	0.24964	0.378494	0.344793	0.232749	0.218279	0.244022	0.214051	0.350313	0.282809	0.165387	0.306093	0.294705	0.227909	0.397622	0.220266	0.17254	0.220723	0.316149	0.237365	0.12268	0.138384	0.16683	0.324339	0.191525	0.278651	0.163843	0.181012	0.174829	0.326564	0.162372	0.278789	0.326291	0.158399	0.272017	0.175051	0.206799	0.245004	0.315023	0.369231
18:1/20:4-PE	764.524	21.8422	0.081939	0.0995707	0.0875807	0.110738	0.12287	0.0612899	0.118418	0.204946	0.137847	0.160903	0.15861	0.0968048	0.0900027	0.0828195	0.0727255	0.156818	0.0939077	0.0542443	0.0876227	0.144458	0.0743813	0.203054	0.103267	0.0825754	0.104348	0.123009	0.0625107	0.0367696	0.0431702	0.0719007	0.114393	0.0657642	0.0569979	0.0789367	0.0856537	0.072793	0.131202	0.0519432	0.0636804	0.0955894	0.0325465	0.0988839	0.0469234	0.0700762	0.106909	0.119591	0.207823
18:1/22:6-PE	788.524	21.4313	0.116813	0.247997	0.157749	0.180693	0.219138	0.175052	0.332214	0.235611	0.255294	0.25419	0.332253	0.257935	0.213364	0.187486	0.288644	0.306062	0.217718	0.114537	0.143914	0.336863	0.185729	0.39993	0.209759	0.147923	0.298214	0.22395	0.0832809	0.0695869	0.0805381	0.130458	0.217243	0.0663065	0.0656024	0.141982	0.0804477	0.176133	0.332779	0.130344	0.0318211	0.196228	0.0703529	0.2263	0.0895539	0.15905	0.170948	0.201923	0.073255
18:1p/18:1-PE	726.544	25.1	0.101621	0.193047	0.209725	0.236358	0.329194	0.174983	0.259416	0.523717	0.367045	0.29934	0.332467	0.156441	0.264408	0.220593	0.324757	0.530914	0.306635	0.217094	0.329179	0.405066	0.339643	0.56867	0.196807	0.203457	0.293408	0.449224	0.212761	0.121293	0.126734	0.283774	0.0762436	0.210143	0.163657	0.211603	0.291923	0.215987	0.549304	0.0978233	0.160695	0.0252372	0.139526	0.2966	0.0874554	0.239198	0.361532	0.243134	0.0806458
18:1p/18:2-PE	724.529	23.287	0.00832952	0.00599767	0.0403788	0.0187131	0.107585	0.013622	0.0253	0.079547	0.0420374	0.083166	0.0575669	0.02559	0.0505799	0.0186262	0.0205609	0.0610046	0.057419	0.0383342	0.106338	0.0216031	0.0411557	0.0508087	0.041185	0.0204525	0.00993391	0.0639723	0.0528334	0.00540198	0.00844586	0.0458702	0.0112172	0.040902	0.0493659	0.0212196	0.0766701	0.0252202	0.0491426	0.00314409	0.115125	0.00648521	0.0210109	0.0260331	0.0138638	0.0206636	0.0963622	0.120725	0.032299
18:1p/20:4-PE	748.529	22.932	0.1779	0.322478	0.318305	0.346331	0.496546	0.249415	0.607128	0.653784	0.498927	0.526028	0.516504	0.468397	0.339752	0.336701	0.368328	0.368254	0.379368	0.2066	0.419807	0.525832	0.37986	0.614414	0.37084	0.291893	0.34379	0.289606	0.279194	0.162188	0.127675	0.294084	0.292542	0.280027	0.348085	0.231548	0.43432	0.296181	0.529302	0.225416	0.451476	0.313775	0.139475	0.340989	0.146076	0.264664	0.360458	0.361573	0.126658
18:1p/22:6-PE	772.529	22.4148	0.162774	0.345494	0.2671	0.33357	0.654181	0.379139	0.635183	0.696279	0.571303	0.485937	0.747037	0.287319	0.584463	0.399771	0.797545	0.97471	0.796097	0.353771	0.500063	0.832265	0.717248	1.19336	0.528726	0.340619	0.732194	0.628703	0.305382	0.211336	0.212678	0.44143	0.102359	0.317269	0.340658	0.410553	0.431444	0.538669	0.979603	0.314699	0.249284	0.0360368	0.227044	0.538164	0.164619	0.429461	0.633021	0.527711	0.123149
16:0-cPA	391.226	11.0273	0.00794327	0.00401207	0.00730154	0.00533424	0.0085013	0.00919158	0.00510909	0.0064675	0.00389385	0.00667456	0.00542472	0.00738373	0.00368105	0.0035458	0.00501359	0.00538216	0.00350878	0.00268296	0.00444992	0.00494855	0.00234668	0.00301022	0.0038762	0.00211999	0.00521808	0.00373348	0.007548	0.00353247	0.00328257	0.0076831	0.010342	0.0168207	0.00712054	0.00836928	0.00602646	0.0100891	0.00600819	0.00802644	0.00720258	0.0147492	0.003028	0.0042283	0.00387815	0.00290044	0.0044237	0.00450304	0.00576834
18:1-cPA	417.241	11.21	0.0155958	0.0186214	0.0123479	0.012086	0.00935035	0.0209213	0.00595568	0.0153145	0.0110342	0.014193	0.0106409	0.00729934	0.0116632	0.00939052	0.038167	0.0235176	0.0390684	0.011746	0.0256071	0.00946216	0.0151696	0.0174921	0.0103253	0.0134969	0.0166455	0.0235712	0.0179393	0.00894441	0.00529454	0.0132704	0.0571893	0.0623038	0.0353006	0.0258605	0.0368555	0.0248467	0.0225415	0.0128548	0.041019	0.0124535	0.0797077	0.0189285	0.0167225	0.00725272	0.00763387	0.0256737	0.0525097
16:0/18:1-PG	747.518	21.878	0.171757	0.303955	0.241578	0.293853	0.592093	0.375305	0.545681	0.855631	0.583636	0.49181	0.64969	0.237378	0.533878	0.391425	0.646585	0.855667	0.616802	0.369706	0.517265	0.723551	0.5998	1.03944	0.475009	0.348018	0.561878	0.585017	0.30685	0.223474	0.185891	0.455048	0.1243	0.29373	0.323466	0.417439	0.363611	0.4618	0.932737	0.270327	0.216422	0.0471089	0.198361	0.399693	0.142435	0.383551	0.585493	0.409458	0.12044
22:6/22:6-PG	865.503	17.8266	0.0225109	0.0580843	0.0312334	0.0378952	0.0437292	0.0298988	0.0643353	0.0595586	0.0709363	0.0456756	0.0727908	0.0503202	0.0463969	0.0388304	0.0710636	0.0622393	0.0307489	0.0275459	0.0327845	0.0646672	0.0614681	0.0759717	0.0568535	0.0279779	0.0625778	0.0447614	0.0170616	0.0126045	0.0181109	0.0328851	0.0336071	0.0285389	0.0547213	0.0383765	0.0308305	0.0523474	0.0663516	0.0397807	0.00804794	0.0305659	0.0234483	0.0494658	0.0173529	0.0287101	0.0491011	0.0319523	0.00965412
16:0/16:0-PI	809.519	20.96	0.0149455	0.020915	0.0198593	0.0164116	0.0329556	0.0455078	0.0276662	0.033985	0.0200193	0.0241577	0.0251366	0.0198338	0.0163704	0.0152287	0.0339579	0.0344535	0.0268889	0.0182746	0.0184631	0.0320204	0.0165329	0.0424458	0.0165062	0.0214131	0.0269539	0.0295638	0.0175207	0.00762568	0.0135926	0.0258005	0.0436507	0.0185374	0.0176847	0.0128205	0.0211363	0.0242559	0.0342044	0.016283	0.0172713	0.00833304	0.00834842	0.0171184	0.0100802	0.0164456	0.0265476	0.0295202	0.00738956
16:0/18:1-PI	835.534	21.2782	0.249325	0.284467	0.334702	0.347813	0.391783	0.350771	0.447836	0.661956	0.355332	0.330757	0.284247	0.33598	0.298466	0.226355	0.357452	0.427396	0.36044	0.206743	0.390113	0.349726	0.221639	0.445022	0.295136	0.164076	0.258194	0.347128	0.215081	0.0972816	0.143191	0.283911	0.474038	0.208704	0.37234	0.193979	0.261708	0.214297	0.312	0.20681	0.260644	0.213429	0.0935416	0.167239	0.136139	0.168282	0.237159	0.321905	0.0922609
16:0/18:2-PI	833.519	19.9179	0.0985699	0.0817084	0.0942316	0.0890987	0.155934	0.0510203	0.122951	0.233805	0.107145	0.122574	0.104928	0.0914889	0.0707968	0.0563609	0.0925467	0.148319	0.118562	0.0739288	0.136094	0.10119	0.0654934	0.127755	0.103651	0.065889	0.0463219	0.106228	0.0987578	0.0231974	0.0397991	0.125591	0.196213	0.0685485	0.16956	0.0732877	0.110318	0.0747887	0.0873132	0.0582035	0.112671	0.0455767	0.0323818	0.0531456	0.0606198	0.0414952	0.0859859	0.189033	0.0417857
16:0/20:3-PI	859.534	20.495	0.0177963	0.0216694	0.022353	0.0280546	0.0640488	0.0145552	0.0283582	0.0822923	0.021431	0.0332136	0.0175353	0.0140979	0.0160927	0.0150297	0.0247258	0.0345315	0.0327975	0.00985212	0.0302535	0.026919	0.0153335	0.0277941	0.0279674	0.0150756	0.0158688	0.025648	0.02182	0.00207498	0.00807952	0.0185104	0.0451761	0.0145281	0.0309502	0.0140916	0.0241551	0.0135854	0.0247837	0.0161555	0.0191368	0.00921701	0.00989834	0.0162427	0.00440158	0.0120903	0.0165488	0.0603317	0.00820378
16:0/20:4-PI	857.519	19.7763	0.407664	0.470237	0.448811	0.480597	0.609948	0.357132	0.682079	0.902004	0.613418	0.603238	0.564918	0.381826	0.43051	0.406864	0.52822	0.716571	0.503992	0.236514	0.434746	0.650012	0.338164	0.845719	0.422026	0.383363	0.433398	0.497746	0.309189	0.161916	0.182559	0.363272	0.505272	0.260287	0.487332	0.320112	0.418584	0.443711	0.59713	0.308828	0.300401	0.374581	0.17012	0.400829	0.19766	0.353357	0.395493	0.450278	0.132777
16:0/22:6-PI	881.519	19.4621	0.0717719	0.144747	0.106108	0.117849	0.151995	0.0959384	0.204168	0.181194	0.142002	0.148494	0.145423	0.1211	0.107142	0.10335	0.173548	0.163814	0.122501	0.0609205	0.104895	0.17773	0.0985897	0.238088	0.122892	0.0800571	0.152949	0.145541	0.0630688	0.0353016	0.04662	0.0884944	0.138401	0.055292	0.0969698	0.0740173	0.0971917	0.127969	0.162784	0.10276	0.0539052	0.0941358	0.0474131	0.115843	0.0474525	0.0856137	0.0956175	0.0952581	0.033167
18:0/18:1-PI	863.566	23.5203	0.168964	0.151457	0.154803	0.274172	0.208645	0.234672	0.147785	0.399395	0.135557	0.206655	0.177227	0.15336	0.119935	0.0892305	0.142687	0.213882	0.137294	0.18808	0.184682	0.143968	0.116242	0.127025	0.127332	0.0819554	0.103821	0.23039	0.115845	0.0347378	0.0723726	0.183968	0.223264	0.117319	0.248841	0.107552	0.195169	0.102403	0.155718	0.0937029	0.204109	0.0787604	0.0422645	0.0576948	0.0503173	0.0673204	0.148084	0.206554	0.0845294
18:0/18:2-PI	861.55	21.9029	0.339285	0.254731	0.193907	0.278604	0.531937	0.160392	0.296649	0.650909	0.242734	0.259803	0.256215	0.174334	0.168674	0.117256	0.226608	0.418101	0.239155	0.204583	0.305554	0.228056	0.164339	0.228799	0.264997	0.143928	0.106568	0.343286	0.259758	0.057476	0.100582	0.341043	0.481185	0.168419	0.470114	0.197896	0.260337	0.13085	0.222305	0.134636	0.321218	0.0706597	0.0561858	0.103954	0.0598064	0.104502	0.26707	0.515568	0.125555
18:0/20:3-PI	887.566	22.5652	0.200208	0.15959	0.172709	0.226534	0.236267	0.153866	0.275453	0.574445	0.143288	0.160089	0.142966	0.150515	0.136049	0.122195	0.162953	0.245463	0.199445	0.0960577	0.203041	0.120026	0.1105	0.203439	0.184099	0.116085	0.131599	0.197305	0.167206	0.036389	0.088756	0.178239	0.216617	0.106975	0.302003	0.153412	0.197361	0.11897	0.183318	0.106655	0.150792	0.0941686	0.0369688	0.0776826	0.0638181	0.0917102	0.119909	0.253199	0.0777715
18:0/20:4-PI	885.55	21.718	3.63378	4.57905	3.90813	3.92758	5.4247	4.03273	5.90921	8.26539	4.97167	4.60751	5.12149	3.41014	3.73632	3.55715	5.11446	6.07473	4.37733	2.00115	3.78539	4.71132	2.89484	7.05373	3.92183	2.90752	4.61368	4.03257	2.51373	1.26306	1.71604	3.05455	4.60246	2.18566	4.51178	2.63592	3.74311	3.47061	5.29021	2.40088	2.64894	2.83098	1.20972	2.89332	1.4617	2.6399	3.02647	3.73682	1.21306
18:0/22:4-PI	913.581	23.3735	0.0536274	0.0721651	0.0425572	0.0560507	0.0852209	0.0636862	0.0903233	0.108332	0.0764653	0.0672028	0.065556	0.0454797	0.0589825	0.0529767	0.0819466	0.0704167	0.086084	0.0299898	0.0594886	0.0583133	0.0314005	0.114127	0.0418007	0.0380753	0.0723245	0.0538817	0.0413693	0.019314	0.0214563	0.0392846	0.0664475	0.0245712	0.0530415	0.0341055	0.0469224	0.0451991	0.0818895	0.0262759	0.0242154	0.0544924	0.0161338	0.0432886	0.0249364	0.0359982	0.032044	0.0510665	0.0162839
18:0/22:5-PI	911.566	22.6	0.221262	0.227568	0.212253	0.214027	0.299989	0.232615	0.27437	0.367577	0.282583	0.247251	0.2545	0.227749	0.222825	0.197758	0.309545	0.27674	0.232846	0.149606	0.213696	0.318291	0.177697	0.298361	0.220097	0.189166	0.213069	0.193332	0.139558	0.108469	0.0975585	0.19527	0.275915	0.142573	0.11373	0.1703	0.154745	0.173423	0.254607	0.185611	0.096515	0.163238	0.0977286	0.162941	0.0958948	0.125475	0.155102	0.171966	0.0791147
18:0/22:6-PI	909.55	21.3949	0.193252	0.454825	0.200768	0.279206	0.36676	0.38134	0.580591	0.387785	0.333201	0.262527	0.410861	0.298445	0.305613	0.283483	0.611782	0.423555	0.373111	0.136781	0.226357	0.400867	0.277633	0.602324	0.298458	0.182949	0.546423	0.284613	0.142436	0.0888672	0.114831	0.214075	0.341735	0.117694	0.24794	0.179745	0.187751	0.361621	0.511106	0.240441	0.0863158	0.218436	0.0976062	0.2426	0.105012	0.199467	0.193861	0.214512	0.0669644
18:1/18:2-PI	859.534	20.1238	0.0436263	0.0448539	0.0350196	0.043248	0.0724265	0.0250269	0.0621334	0.0942948	0.0304839	0.0523112	0.0385364	0.0405741	0.0246435	0.0230714	0.0432585	0.0530612	0.0303203	0.0334344	0.0547832	0.0347761	0.0261086	0.0473231	0.0569695	0.0206021	0.0169448	0.0513616	0.0275899	0.00995898	0.0137936	0.0350019	0.0700859	0.020156	0.0572594	0.0355813	0.0397588	0.0212156	0.0322396	0.016262	0.0481359	0.0107818	0.00748371	0.01841	0.0103203	0.0131199	0.0326822	0.0655267	0.0193955
18:1/20:4-PI	883.534	20.0063	0.267249	0.373125	0.399606	0.41226	0.447594	0.305876	0.500629	0.651192	0.481862	0.525703	0.436365	0.360203	0.342375	0.303542	0.541004	0.51876	0.382667	0.193248	0.33516	0.487494	0.262496	0.663973	0.384997	0.278293	0.368384	0.417951	0.201502	0.129611	0.148827	0.290091	0.497682	0.230708	0.278509	0.242396	0.343189	0.311691	0.562386	0.238527	0.193777	0.281015	0.152357	0.30178	0.151364	0.241048	0.281601	0.352949	0.124438
d18:1/12:0-Cer	482.457	13.9197	1.34218	1.51989	1.91579	1.35665	0.907808	0.87599	1.55903	1.17465	1.16239	1.4501	1.1217	1.06604	0.965792	1.2013	0.588731	0.834617	0.729018	0.817696	0.875557	1.53445	0.92911	1.34975	1.48137	1.55837	1.2981	0.938236	1.04414	0.869678	1.24709	1.20578	3.74169	1.36678	1.64324	0.866486	1.34449	1.22749	0.870101	2.4372	1.4264	8.37882	0.745665	1.62169	1.66213	1.16387	1.16548	1.96401	2.36962
d18:1/16:0-Cer	538.519	23.2195	0.121308	0.141106	0.148173	0.112507	0.215965	0.166634	0.15999	0.185578	0.146165	0.169871	0.168534	0.15419	0.100098	0.108375	0.168396	0.160853	0.138983	0.117101	0.154247	0.146484	0.120195	0.216737	0.154401	0.126218	0.206791	0.144551	0.126371	0.11054	0.118673	0.18578	0.191006	0.144102	0.0923693	0.162487	0.144323	0.159038	0.208532	0.13343	0.135332	0.114327	0.0946501	0.150955	0.0995127	0.0966167	0.128456	0.170836	0.191278
d18:1/18:0-Cer	566.551	26.0352	0.418679	0.54305	0.543998	0.566379	0.693196	0.847831	0.577309	0.597761	0.6495	0.730218	0.872442	0.527604	0.501464	0.550937	0.669103	0.6765	0.47465	0.367315	0.372095	0.752987	0.47497	0.831966	0.462307	0.485403	0.779381	0.604346	0.280903	0.318304	0.253991	0.462563	0.482545	0.364708	0.176533	0.467771	0.343317	0.607282	0.947322	0.411615	0.337509	0.351385	0.327941	0.653519	0.293429	0.384719	0.630847	0.514339	0.247657
d18:1/20:0-Cer	594.582	29.189	0.0807494	0.099673	0.100282	0.0991684	0.133567	0.0900145	0.097362	0.129592	0.094994	0.140409	0.136632	0.114907	0.0987301	0.0802759	0.117709	0.121873	0.0997917	0.0823983	0.0724178	0.134771	0.0998773	0.147348	0.108247	0.0900523	0.147459	0.108558	0.0637042	0.0547885	0.0866946	0.118197	0.0932301	0.0937371	0.05711	0.0973152	0.0993485	0.101075	0.135728	0.0716314	0.069345	0.0633453	0.0610078	0.0887888	0.0506989	0.0617805	0.106394	0.092779	0.0886904
d18:1/22:0-Cer	622.613	32.52	0.115258	0.0829139	0.0840014	0.0818003	0.187666	0.0839419	0.0625235	0.177711	0.0842552	0.170555	0.147034	0.108418	0.0964642	0.0465685	0.0877695	0.143665	0.0936582	0.0985	0.0975759	0.0874501	0.0992534	0.106588	0.127449	0.113219	0.0804066	0.130422	0.0964254	0.0633194	0.136502	0.165193	0.104944	0.163461	0.10415	0.114913	0.132222	0.0788536	0.105142	0.0799241	0.149058	0.0930122	0.0873694	0.0687043	0.0667159	0.0478731	0.110012	0.145395	0.19358
d18:1/24:0-Cer	650.645	34.7027	0.214239	0.150465	0.140867	0.165491	0.227252	0.184812	0.169696	0.366999	0.122414	0.355163	0.351514	0.171027	0.179622	0.0715677	0.185406	0.250854	0.130807	0.187175	0.209	0.133194	0.200217	0.258815	0.142572	0.192232	0.128286	0.265875	0.178352	0.0715861	0.15556	0.251639	0.198459	0.326562	0.259866	0.223888	0.321326	0.167539	0.251077	0.113841	0.247404	0.115649	0.129371	0.13232	0.102917	0.141499	0.233306	0.395689	0.35474
d18:1/24:1-Cer	648.629	32.2927	0.0836332	0.124861	0.116737	0.126469	0.173725	0.155217	0.115138	0.226894	0.0977395	0.247269	0.19142	0.176884	0.119355	0.0798872	0.125082	0.166341	0.102458	0.10956	0.0968056	0.123245	0.158146	0.191144	0.125488	0.104718	0.123572	0.164562	0.130839	0.0526298	0.0872775	0.13619	0.13289	0.156112	0.1316	0.13446	0.190345	0.107011	0.167529	0.0910251	0.171273	0.0200283	0.0681875	0.122812	0.0731399	0.0539382	0.16144	0.150521	0.25579
d18:2/18:0-Cer	564.535	23.6615	0.055735	0.1081	0.097419	0.115334	0.108359	0.0298502	0.108782	0.130593	0.0905187	0.125711	0.224304	0.110055	0.0786007	0.0960784	0.139331	0.114082	0.0940527	0.0577611	0.0617871	0.150599	0.0809356	0.175759	0.0848458	0.0865091	0.137263	0.135373	0.0595598	0.0412187	0.0344819	0.0911656	0.0636991	0.0673109	0.0212319	0.0798484	0.0714046	0.126993	0.217725	0.0636459	0.0352459	0.0588184	0.0385777	0.135874	0.0384114	0.0737167	0.0970397	0.0897618	0.0444049
d18:0/24:0-MHC	814.713	33.3797	0.136337	0.0893137	0.253195	0.127429	0.189845	0.156079	0.126936	0.123694	0.106993	0.212421	0.107811	0.226573	0.159372	0.121062	0.165609	0.133836	0.0941155	0.118286	0.116293	0.0647588	0.156423	0.249379	0.201979	0.0898763	0.0535769	0.151818	0.102641	0.0276669	0.0895264	0.119338	0.079954	0.0921699	0.125289	0.155078	0.230051	0.0845583	0.20097	0.114368	0.110224	0.043961	0.0389419	0.0854729	0.0698842	0.0439201	0.169215	0.154157	0.070295
d18:0/24:1-MHC	812.697	30.1062	0.858726	0.614449	1.35529	0.834515	1.17031	1.06253	0.865384	1.21681	0.695178	1.45171	0.965646	1.54521	0.789847	0.56318	0.813825	0.893386	0.718144	0.789943	0.846897	0.687915	0.895163	1.47129	0.951908	0.623722	0.449875	0.802475	0.603795	0.248524	0.549247	0.71677	0.540657	0.634765	0.885097	0.908994	1.34547	0.611242	1.24047	0.624345	0.965963	0.322354	0.258865	0.583071	0.457203	0.355172	0.927246	0.708686	0.38022
d18:1/12:0-MHC	644.51	15.2867	1.63204	1.77597	1.74963	1.59912	1.64544	0.842609	1.57875	1.72862	1.62512	1.77457	1.66868	1.66155	1.78464	1.65912	1.47342	1.36194	1.58263	1.47501	1.33461	1.46307	1.31967	1.72164	1.89262	1.33445	1.42643	1.20398	1.66094	1.30072	1.73892	1.47812	1.89027	1.47656	1.48973	1.20575	1.67939	1.41621	1.65621	1.53263	1.45843	1.85793	1.71966	1.58669	1.4986	1.67356	1.5714	1.57846	1.62924
d18:1/16:0-MHC	700.572	20.9181	0.0778662	0.0693003	0.115808	0.0628409	0.120318	0.0812571	0.0908671	0.126773	0.0784225	0.108377	0.0942502	0.129211	0.0838124	0.0526584	0.0685043	0.118735	0.0852869	0.0690116	0.0720356	0.063071	0.0885873	0.124853	0.0766696	0.0577611	0.0681281	0.0908648	0.066575	0.0309269	0.04841	0.0735874	0.0833097	0.0851613	0.0891437	0.0826672	0.108297	0.0676327	0.119106	0.0701438	0.101471	0.0337981	0.0214762	0.089186	0.0536792	0.0383956	0.105349	0.086903	0.0554195
d18:1/18:0-MHC	728.603	23.2648	0.332287	0.337469	0.506186	0.400097	0.546254	0.406354	0.379895	0.48819	0.402859	0.534004	0.422524	0.586185	0.308651	0.29396	0.395384	0.415641	0.343446	0.292963	0.365096	0.432893	0.34434	0.540226	0.346314	0.279893	0.278374	0.355976	0.249845	0.141018	0.230203	0.283277	0.245066	0.254819	0.306632	0.350414	0.382891	0.352309	0.470704	0.283989	0.359463	0.178966	0.133844	0.262818	0.205909	0.1979	0.325094	0.266597	0.137558
d18:1/20:0-MHC	756.635	26.03	0.120317	0.111923	0.197425	0.13314	0.143603	0.122893	0.141777	0.19797	0.133934	0.222832	0.155903	0.268577	0.146223	0.0895488	0.148326	0.15492	0.115214	0.136903	0.152404	0.121809	0.154037	0.212059	0.135047	0.0941473	0.0752037	0.128226	0.0916042	0.0345458	0.0707849	0.10981	0.104862	0.0950803	0.147309	0.13531	0.187189	0.089765	0.187321	0.0943862	0.126428	0.0460684	0.0359811	0.0749761	0.072115	0.0594545	0.129508	0.0989561	0.0508706
d18:1/22:0-MHC	784.666	29.0305	0.337349	0.270794	0.54595	0.359892	0.451118	0.301643	0.375029	0.57124	0.302466	0.632911	0.392895	0.668313	0.334386	0.220794	0.307338	0.40589	0.309388	0.322567	0.381119	0.299248	0.372358	0.589054	0.390218	0.27609	0.179416	0.339675	0.253857	0.101007	0.194156	0.317295	0.237998	0.290186	0.420923	0.389633	0.541138	0.251411	0.527292	0.251237	0.393752	0.137915	0.100584	0.22598	0.186136	0.165751	0.394984	0.313281	0.177234
d18:1/24:0-MHC	812.697	32.2004	0.858726	0.614449	1.35529	0.834515	1.17031	1.06253	0.865384	1.21681	0.695178	1.45171	0.965646	1.54521	0.789847	0.56318	0.813825	0.893386	0.718144	0.789943	0.846897	0.687915	0.895163	1.47129	0.951908	0.623722	0.449875	0.802475	0.603795	0.248524	0.549247	0.71677	0.540657	0.634765	0.885097	0.908994	1.34547	0.611242	1.24047	0.624345	0.965963	0.322354	0.258865	0.583071	0.457203	0.355172	0.927246	0.708686	0.38022
d18:1/24:1-MHC	810.682	28.8168	1.37813	1.17962	2.16512	1.66896	2.20113	1.78705	1.43761	2.32447	1.19665	2.55283	1.41278	2.60061	1.56694	0.95269	1.39885	1.46261	1.227	1.32611	1.68521	1.40666	1.34076	2.2871	1.62268	1.07973	0.82005	1.17746	1.02629	0.445	0.648573	1.10118	0.884653	0.808197	1.37697	1.42802	1.71643	1.04854	2.03216	0.978661	1.95276	0.566803	0.426255	0.792407	0.865816	0.522849	1.46702	1.10597	0.503557
d18:2/18:0-MHC	726.588	21.2981	0.115315	0.121076	0.208819	0.142092	0.263252	0.0360367	0.189921	0.250165	0.128528	0.201601	0.156084	0.257324	0.1113	0.102378	0.128631	0.121448	0.132271	0.121648	0.135859	0.125761	0.12888	0.249047	0.15789	0.0850967	0.0625278	0.141502	0.112313	0.0480742	0.0801991	0.118752	0.086171	0.100439	0.142059	0.139435	0.163321	0.132477	0.181312	0.0772191	0.172162	0.0590461	0.0259572	0.0882271	0.0810992	0.0603034	0.136282	0.094978	0.0248726
d18:2/22:0-MHC	782.65	26.4822	0.21208	0.161075	0.349879	0.262189	0.316299	0	0.148083	0.373793	0.177398	0.424542	0.262139	0.471599	0.203707	0.149244	0.186426	0.19625	0.238036	0.216783	0.28615	0.212992	0.226485	0.306397	0.24898	0.163212	0.0957254	0.225208	0.157921	0.059128	0.090622	0.213235	0.130703	0.168053	0.313888	0.235341	0.372198	0.13639	0.289827	0.117016	0.281357	0.0978303	0.0586507	0.172959	0.133402	0.107477	0.213424	0.19949	0.0992564
d18:2/24:0-MHC	810.682	29.4775	0.89037	0.559507	1.11034	0.903378	0.970834	0.782257	0.712669	1.14462	0.481558	1.14354	0.827269	1.21192	0.672661	0.422585	0.515486	0.719961	0.6176	0.837128	0.756561	0.700833	0.676458	1.00053	0.63934	0.499421	0.373527	0.870788	0.524683	0.145724	0.380086	0.675846	0.363676	0.550209	0.864756	0.672213	1.10536	0.554269	1.13086	0.458181	0.980167	0.331519	0.162127	0.571057	0.383406	0.293534	0.721959	0.743955	0.392895
d18:2/24:1-MHC	808.666	26.3241	0.75336	0.549566	0.998164	0.940931	1.18977	0.446781	0.781236	1.32071	0.537778	1.57962	0.757074	1.33843	0.729832	0.431246	0.654061	0.725354	0.696753	0.724103	0.885358	0.75032	0.657098	1.15503	0.801573	0.528181	0.387524	0.684694	0.56046	0.205812	0.236957	0.621827	0.408922	0.436967	0.798347	0.698855	0.915124	0.509423	0.875576	0.401335	1.02872	0.299991	0.17467	0.435309	0.447591	0.244234	0.643347	0.606241	0.260949
d18:0/18:0-SM	733.622	23.626	0.0372798	0.0313742	0.0401498	0.0324171	0.0571611	0.0393018	0.0365171	0.0526943	0.0358982	0.0557832	0.0478779	0.0314306	0.0410323	0.0305663	0.0475452	0.047104	0.0377704	0.0234588	0.0286252	0.0473785	0.0397014	0.0682282	0.0384191	0.0294721	0.0392521	0.0357607	0.0292166	0.0147906	0.0251569	0.0412165	0.03916	0.0297263	0.0342428	0.034184	0.0430774	0.0374064	0.0521744	0.0277017	0.036031	0.0173035	0.01431	0.0323924	0.0185391	0.0161057	0.0401714	0.0428339	0.0150142
d18:1/12:0-SM	647.512	15.9592	2.29894	2.61316	1.56327	2.78386	2.52891	1.79314	2.87909	2.49364	2.52445	2.3338	2.52337	2.55022	2.43074	2.41929	1.46376	2.28585	2.36021	2.06322	2.1483	2.12767	1.70715	2.2971	1.89017	2.66156	2.41385	2.03885	2.16585	1.93766	1.58887	2.06478	2.51541	1.83335	2.10728	2.25359	1.80705	2.51255	1.98149	1.86324	1.86434	2.67544	1.77735	1.88998	1.21479	1.52585	2.88305	2.38403	2.46458
d18:1/14:0-SM	675.544	18.0438	0.107934	0.112673	0.160789	0.130004	0.149353	0.178043	0.13792	0.184938	0.159894	0.150329	0.174485	0.149467	0.110639	0.114894	0.189261	0.184533	0.136908	0.0925464	0.115503	0.141394	0.128697	0.253318	0.102597	0.0962836	0.159613	0.162442	0.125453	0.0594898	0.0800646	0.134693	0.165869	0.116112	0.121497	0.128779	0.141995	0.152572	0.202195	0.09348	0.105457	0.0773254	0.0439468	0.114128	0.0688407	0.0830998	0.123935	0.128479	0.0873625
d18:1/16:0-SM	703.575	20.2267	2.00275	2.09104	2.16516	2.14267	3.35805	2.99545	2.27996	3.45467	1.97539	3.26321	2.68431	2.50655	1.88189	1.61375	2.58193	2.93899	2.37087	1.47187	2.00915	2.56339	1.98311	4.04974	1.81959	1.66173	2.7771	2.20763	1.97506	1.06644	1.11395	2.16781	2.39315	2.01022	2.21752	2.03134	2.87826	2.35954	3.5886	1.55807	2.47434	1.26819	0.679132	2.29708	1.20272	1.14563	2.27315	2.43522	1.25035
d18:1/18:0-SM	731.606	22.5647	1.62213	1.70968	1.96814	1.77367	2.69269	2.96359	2.05161	2.25958	2.04306	2.80859	2.72061	1.89281	1.89879	1.65001	2.63032	2.58265	1.71494	1.14807	1.50207	2.78061	1.64255	3.15464	1.48578	1.58185	2.53724	1.946	1.18495	0.910573	0.950332	1.55203	1.90348	1.2624	0.956298	1.60016	1.34012	1.79342	3.06001	1.49343	0.924038	1.12593	0.872457	1.99268	0.854907	1.12043	1.91908	1.58366	0.654127
d18:1/18:1-SM	729.591	21	0.380898	0.482733	0.470727	0.459538	0.6616	0.419078	0.565789	0.646241	0.409003	0.688819	0.678763	0.481166	0.414589	0.375602	0.567532	0.591229	0.439935	0.276119	0.380842	0.586623	0.43303	0.835786	0.407472	0.380336	0.582364	0.588667	0.346181	0.200122	0.243594	0.431567	0.410754	0.390346	0.409514	0.40072	0.477718	0.510227	0.685534	0.311539	0.357159	0.302755	0.170224	0.5605	0.253843	0.281796	0.419355	0.457397	0.178619
d18:1/22:0-SM	787.669	28.3338	0.253565	0.191327	0.234275	0.211732	0.321124	0.251516	0.200869	0.340296	0.17581	0.362609	0.288435	0.227811	0.241992	0.139663	0.209823	0.237087	0.206432	0.181346	0.233756	0.186409	0.224834	0.330949	0.185761	0.203816	0.168263	0.207464	0.220455	0.0909083	0.127964	0.219044	0.199345	0.269135	0.255747	0.215291	0.29324	0.202443	0.273669	0.128292	0.286691	0.108048	0.0822957	0.149657	0.119152	0.0944212	0.209994	0.26111	0.149043
d18:1/24:0-SM	815.7	31.584	0.145032	0.10049	0.110325	0.117025	0.187348	0.150327	0.106491	0.1567	0.0821615	0.213903	0.16607	0.127646	0.135818	0.0734021	0.114668	0.131422	0.121313	0.098063	0.12834	0.106316	0.126817	0.207045	0.11152	0.109843	0.115237	0.111358	0.115362	0.0513518	0.0712311	0.118173	0.107606	0.154463	0.143854	0.122681	0.176769	0.124444	0.159685	0.0720181	0.174975	0.057392	0.0431924	0.102549	0.062632	0.0471095	0.121739	0.14248	0.12028
d18:1/24:1-SM	813.684	28.2347	0.461412	0.475797	0.60477	0.569617	0.764117	0.670301	0.496271	0.811674	0.41892	0.756503	0.568272	0.657928	0.630112	0.323751	0.493574	0.580813	0.485237	0.379432	0.534247	0.55218	0.487175	0.812256	0.530047	0.413981	0.441768	0.495866	0.513407	0.209866	0.328176	0.535901	0.541572	0.500107	0.686761	0.438348	0.852366	0.454023	0.643299	0.380029	0.80564	0.257498	0.170607	0.431352	0.307276	0.213045	0.545855	0.443671	0.309869
d18:1/24:2-SM	811.669	25.6275	0.372658	0.383642	0.450665	0.435506	0.63738	0.401098	0.407565	0.668989	0.301152	0.616798	0.475176	0.516831	0.436032	0.261242	0.359406	0.463486	0.438835	0.291255	0.374354	0.47541	0.402919	0.690514	0.406131	0.322155	0.339701	0.45203	0.413251	0.157067	0.245289	0.460469	0.434728	0.445572	0.554161	0.368279	0.699797	0.417285	0.491287	0.264931	0.661925	0.197034	0.131316	0.440547	0.240956	0.197923	0.42406	0.405937	0.231297
d18:2/18:0-SM	729.591	20.7073	0.380898	0.482733	0.470727	0.459538	0.6616	0.419078	0.475558	0.646241	0.409003	0.688819	0.678763	0.481166	0.414589	0.375602	0.567532	0.591229	0.439935	0.276119	0.380842	0.586623	0.43303	0.835786	0.407472	0.380336	0.582364	0.588667	0.346181	0.200122	0.243594	0.431567	0.410754	0.390346	0.409514	0.40072	0.477718	0.510227	0.685534	0.311539	0.357159	0.302755	0.170224	0.5605	0.253843	0.281796	0.419355	0.457397	0.178619
d18:2/18:1-SM	727.575	20.9567	0.00908578	0.0126846	0.0122638	0.00982393	0.0228398	0.0131647	0.00897947	0.0179012	0.0111119	0.021296	0.0174846	0.0120191	0.0119971	0.00893855	0.015838	0.0146968	0.0162999	0.00714653	0.01185	0.0167867	0.013465	0.0249062	0.0137	0.0110086	0.0148302	0.0135456	0.0132736	0.00450999	0.00811277	0.0156289	0.0129953	0.0131102	0.0158895	0.0121855	0.0180547	0.0137611	0.0165681	0.00724165	0.0170542	0.00553962	0.00362495	0.0137265	0.00630004	0.00582953	0.013967	0.0152735	0.00503731
d18:2/20:0-SM	757.622	22.9826	0.124769	0.155345	0.145902	0.161007	0.210071	0.137926	0.163388	0.221352	0.108327	0.20526	0.172691	0.146213	0.126081	0.105252	0.147339	0.147581	0.135109	0.107434	0.13546	0.142555	0.143336	0.216557	0.115479	0.127923	0.114074	0.144935	0.130933	0.074359	0.0772201	0.163364	0.115851	0.169573	0.168179	0.127213	0.197232	0.144691	0.140147	0.0828738	0.133103	0.0783287	0.0566436	0.127306	0.091415	0.0907017	0.117506	0.155228	0.0778202
d18:2/22:0-SM	785.653	25.7548	0.245172	0.236922	0.298901	0.2866	0.404273	0.29039	0.178358	0.506267	0.208256	0.464269	0.352395	0.297083	0.27759	0.178668	0.26228	0.301609	0.283558	0.196464	0.265832	0.261123	0.282674	0.443893	0.210928	0.221292	0.199659	0.275946	0.286296	0.0769674	0.143489	0.287365	0.243359	0.327477	0.352098	0.2521	0.383681	0.259066	0.335745	0.144978	0.353415	0.138405	0.0877901	0.227791	0.155114	0.135275	0.245678	0.302321	0.145021
d18:2/24:2-SM	809.653	23.83	0.0520871	0.0433338	0.051449	0.0474675	0.0937626	0.0283607	0.0375982	0.0773481	0.0432644	0.0775329	0.0610253	0.062231	0.0580108	0.030397	0.0434537	0.0645833	0.0619885	0.0349059	0.0392251	0.0700482	0.0471255	0.105459	0.0502285	0.0396946	0.0419551	0.0611296	0.0512532	0.0177648	0.0288259	0.0632136	0.0587455	0.0530179	0.0553165	0.0499665	0.0767074	0.0541508	0.0687477	0.0289715	0.0807249	0.0240554	0.017543	0.0711077	0.0268593	0.0282503	0.0539004	0.0599803	0.0262277
d20:0/18:1-SM	759.637	25.3103	0.21695	0.234858	0.280826	0.235193	0.334711	0.341384	0.273664	0.350762	0.222172	0.335115	0.342114	0.275223	0.273032	0.214211	0.295919	0.295421	0.243615	0.191187	0.231274	0.271062	0.262447	0.386964	0.192833	0.208007	0.251389	0.244862	0.227003	0.100743	0.138399	0.232101	0.207908	0.229595	0.226904	0.235716	0.286196	0.237248	0.330948	0.156178	0.20933	0.109362	0.0993763	0.186519	0.117996	0.129772	0.237532	0.240076	0.124329
16:0-ChE	642.618	38.5188	0.0175639	0.0138007	0.0176027	0.0176547	0.0219375	0.0261761	0.0188987	0.0213009	0.0150832	0.0205775	0.0181772	0.0153856	0.0150345	0.0108132	0.0174454	0.0147123	0.0113591	0.011337	0.0124156	0.0172101	0.0129395	0.0229007	0.016116	0.0148876	0.0122955	0.0154109	0.0140609	0.00737505	0.00993328	0.0162819	0.0169739	0.0114036	0.0140661	0.0158723	0.0188899	0.0148709	0.0213915	0.0120993	0.0142339	0.00518033	0.00465261	0.0111538	0.00790467	0.00852268	0.0133542	0.0141181	0.0077995
16:1-ChE	640.603	37.9146	0.00488451	0.00572186	0.00768238	0.00995027	0.00806985	0.00626808	0.00975634	0.0175441	0.00938943	0.00950555	0.0086216	0.00686263	0.011518	0.00502459	0.00850901	0.0107996	0.00652542	0.00374357	0.00830777	0.00786336	0.00698696	0.0178777	0.00769485	0.00601564	0.00740472	0.00932342	0.00552061	0.00237916	0.00813019	0.00842921	0.0103339	0.00781484	0.00612816	0.00786959	0.0122034	0.00607388	0.0122878	0.00406764	0.0033189	0.00329953	0.00245247	0.00646138	0.00249854	0.00640631	0.00715234	0.0115439	0.00233318
18:1-ChE	668.634	38.4681	0.0523321	0.0488498	0.0671506	0.0667977	0.0681638	0.0562076	0.0806666	0.0884161	0.056655	0.0630719	0.0582308	0.0513121	0.0503982	0.0441402	0.0707203	0.0615183	0.049239	0.0315836	0.0562313	0.0600455	0.0443712	0.07784	0.0519164	0.0457394	0.0390888	0.0507963	0.0413516	0.0235453	0.0331822	0.047607	0.0600229	0.044039	0.0461222	0.0468953	0.056262	0.0402211	0.0585933	0.0399072	0.0374804	0.0305497	0.0203995	0.0339528	0.024235	0.0360012	0.0460473	0.0549681	0.0233299
18:2-ChE	666.618	37.9685	0.177877	0.152717	0.182479	0.158785	0.211102	0.111202	0.219622	0.289905	0.147036	0.188497	0.182084	0.158089	0.146796	0.0970682	0.146	0.179317	0.16106	0.110423	0.165288	0.142968	0.144871	0.22263	0.172632	0.128739	0.0668044	0.144537	0.159622	0.0438427	0.0956532	0.171529	0.14862	0.160455	0.176702	0.171315	0.172134	0.107358	0.144767	0.0799445	0.158654	0.0504248	0.0446734	0.0809252	0.0611411	0.075123	0.157509	0.201202	0.0848137
18:3-ChE	664.603	37.5398	0.00860344	0.00584996	0.00716237	0.00983285	0.0156865	0.00353569	0.0068213	0.0270283	0.00732484	0.00868602	0.0103281	0.00891836	0.00982974	0.0037487	0.00447628	0.0123184	0.0112153	0.00458238	0.0111851	0.00613522	0.00643074	0.0161776	0.00558091	0.00582909	0.00245277	0.0077945	0.00822152	0.00209654	0.00523689	0.00916191	0.00651752	0.0118666	0.0155884	0.0104969	0.0266859	0.00538461	0.011581	0.00246133	0.00757534	0.00249244	0.00295303	0.00272056	0.00268634	0.00329542	0.00726336	0.0163646	0.0033364
20:3-ChE	692.634	38.0417	0.017253	0.0149621	0.0294809	0.0157643	0.0322194	0.00998204	0.0233701	0.0367736	0.0198093	0.0264644	0.0231799	0.0184622	0.0155487	0.0111086	0.0125123	0.0257048	0.0183319	0.00916799	0.0200071	0.0198312	0.0137142	0.0265162	0.015848	0.0160007	0.0104218	0.0162745	0.0165167	0.00565656	0.00840315	0.0151958	0.0127301	0.0196517	0.0238	0.0183092	0.0339099	0.0131849	0.0196151	0.0055358	0.0169191	0.00767531	0.00423799	0.00973583	0.00775227	0.00911273	0.0204594	0.0211339	0.00705517
20:4-ChE	690.618	37.7062	0.123821	0.112154	0.21929	0.116549	0.236413	0.0737455	0.168032	0.288952	0.145795	0.195008	0.166797	0.132457	0.115484	0.0828485	0.0927889	0.193288	0.129646	0.0684315	0.147564	0.148085	0.101896	0.194121	0.116166	0.117368	0.0775693	0.122653	0.122774	0.0415186	0.0616989	0.112371	0.0944133	0.147979	0.17551	0.132614	0.249077	0.0956959	0.144439	0.0401852	0.127384	0.0579853	0.0317622	0.071661	0.0566203	0.0681926	0.149556	0.169297	0.0522819
20:5-ChE	688.603	37.2569	0.0104815	0.0359547	0.0177681	0.0133183	0.0234271	0.00558884	0.0123163	0.0464814	0.0114113	0.014274	0.0381803	0.0241781	0.010478	0.00653572	0.00963768	0.0149828	0.0141944	0.00653009	0.015756	0.0187352	0.0851504	0.0235953	0.0235697	0.00768169	0.0061164	0.0252102	0.0113457	0.00236789	0.00794173	0.00937319	0.00523384	0.0148252	0.0680814	0.0232861	0.08215	0.0231579	0.0164019	0.00830455	0.0182328	0.00418574	0.00246689	0.00736139	0.00423662	0.00363215	0.0137296	0.0181127	0.00526953
22:4-ChE	718.65	38.1261	0.00224838	0.00202933	0.00296577	0.00200134	0.00332864	0.000689345	0.00267998	0.00319815	0.00195094	0.00273671	0.00250123	0.00193071	0.0017549	0.0013484	0.00190839	0.00244351	0.0021294	0.00122138	0.00208574	0.00229048	0.00170255	0.00240449	0.00174786	0.00155717	0.0011471	0.00161117	0.00161248	0.000754546	0.00109757	0.00169737	0.00214836	0.0018898	0.00201652	0.00174375	0.00237666	0.00133692	0.00188433	0.0010054	0.0014955	0.000824619	0.00065519	0.00111206	0.00110674	0.00118034	0.00178609	0.002251	0.00105175
22:5-ChE	716.634	37.7598	0.00495494	0.00856887	0.00797709	0.00707706	0.00943031	0.00418283	0.0104547	0.0135142	0.00758905	0.008181	0.0102897	0.00906923	0.00508388	0.0053324	0.00646512	0.00965072	0.00562485	0.00362155	0.0062424	0.00916501	0.00808411	0.00954786	0.009241	0.00470163	0.00688181	0.00912762	0.00505015	0.00143643	0.00307898	0.00552301	0.00512569	0.00554365	0.00892082	0.00664278	0.0143847	0.00763055	0.0102604	0.0037217	0.00590029	0.00126119	0.00171597	0.00558015	0.00224977	0.0038864	0.00794729	0.00975194	0.00271317
22:6-ChE	714.618	37.4556	0.0331472	0.0582951	0.055682	0.0476966	0.0641299	0.0290385	0.0710543	0.0907522	0.0535852	0.0548692	0.0690254	0.0620753	0.0342639	0.0366482	0.0432183	0.0650164	0.036989	0.0250944	0.0431428	0.0607628	0.0563858	0.0649499	0.0648322	0.0313606	0.046432	0.0615017	0.0352218	0.0102143	0.0206628	0.0389835	0.0350444	0.0381682	0.0604385	0.0436245	0.101343	0.0519782	0.0670966	0.026308	0.0400868	0.0099628	0.0119943	0.0384161	0.0153795	0.0258414	0.0548768	0.0645441	0.018412
16:0/16:0-DG	586.54	28.5	0.641984	0.413089	0.408464	0.478313	0.354197	0.972512	0.459459	0.605984	0.446375	0.35616	0.331587	0.355145	0.353442	0.245543	0.581587	0.310898	0.290017	0.670944	0.496743	0.677073	0.207045	0.419485	0.313047	0.410838	0.358852	0.38498	0.336442	0.236773	0.846462	0.517275	0.410247	0.367807	0.318324	0.406268	0.271982	0.476902	0.482598	0.264247	0.390079	0.513245	0.30408	0.236669	0.163593	0.250022	0.60461	0.511405	0.532794
16:0/18:1-DG	612.556	28.7	0.52544	0.464974	0.607769	0.33351	0.508203	0.397034	0.418995	1.27232	0.379764	0.457128	0.341234	0.299728	0.530219	0.270096	0.291407	0.375196	0.265608	0.381878	0.452877	2.95816	0.276253	0.475866	0.373335	0.447034	0.318453	0.429804	0.848992	0.145249	0.477935	0.72257	0.885673	0.486191	0.959882	0.336994	0.501214	0.436822	0.740224	0.868359	0.818235	1.61453	0.110855	0.358606	0.44431	0.204679	0.550615	0.892402	1.88042
16:0/18:2-DG	610.541	26.4998	0.414887	0.30721	0.38117	0.147086	0.41414	0.0940234	0.221514	0.701447	0.18309	0.160539	0.114659	0.0720387	0.207902	0.03758	0.0936784	0.203875	0.0895382	0.272336	0.384789	0.718158	0.0989239	0.168504	0.22311	0.211111	0.0947959	0.294287	0.785358	0.0622782	0.177595	0.960392	0.33998	0.237957	0.780506	0.212345	0.325856	0.126281	0.236348	0.215356	0.693117	1.87772	0.077877	0.168039	0.225196	0.0747672	0.246379	0.803502	1.13383
18:0/16:0-DG	614.572	31.9333	0.606388	0.419328	0.429052	0.524221	0.405636	0.623152	0.402405	0.36734	0.395412	0.4518	0.403147	0.437429	0.363209	0.419496	0.446351	0.414644	0.421861	0.531076	0.49971	1.27328	0.364317	0.40044	0.381646	0.509902	0.496251	0.434765	0.493795	0.435064	0.626144	0.514306	0.603007	0.486104	0.4977	0.507037	0.448774	0.452684	0.49209	0.719084	0.659768	0.61357	0.721074	0.473567	0.491585	0.472206	0.5442	0.487942	1.1438
18:0/18:0-DG	642.603	34.5307	0.570632	0.318383	0.411727	0.468069	0.298102	0.463753	0.13651	0.342067	0.319693	0.34468	0.363175	0.302398	0.352067	0.220407	0.37314	0.16656	0.229233	0.499517	0.304367	0.396454	0.255101	0.165099	0.217466	0.338194	0.285589	0.271376	0.295226	0.192983	0.474598	0.433116	0.217225	0.307914	0.170281	0.532309	0.215458	0.422828	0.461431	0.20772	0.246766	0.2709	0.622613	0.185004	0.161248	0.212259	0.231494	0.295851	0.297826
18:1/18:1-DG	638.572	29.1541	0.60552	0.399494	0.621536	0.304508	0.469274	0.0479613	0.171721	1.30553	0.340274	0.226476	0.175779	0.244247	0.735829	0.116759	0.12158	0.251862	0.162408	0.272648	0.42806	0.670108	0.321444	0.230775	0.286211	0.438231	0.174282	0.342412	1.05841	0.0713678	0.271522	0.575848	0.402454	0.246459	0.891295	0.261854	0.471203	0.491244	0.628052	0.175387	0.797258	2.98035	0.0613346	0.124432	0.44855	0.0963259	0.348527	0.944985	0.78303
18:1/18:2-DG	636.556	26.8409	1.08503	0.767368	0.789952	0.337045	1.15824	0.0918669	0.422963	1.91325	0.506217	0.494858	0.316628	0.332463	0.732664	0.186267	0.157927	0.649788	0.266286	0.424456	0.575798	0.806534	0.400955	0.320728	0.663153	0.807269	0.245274	0.664178	1.75744	0.0891686	0.317293	0.897186	0.770731	0.399173	1.47369	0.644323	0.693059	0.730101	0.828084	0.192557	1.26413	5.06374	0.0655825	0.258081	0.649197	0.0999594	0.475934	1.97138	1.07006
18:0/18:1-DG	640.587	32.3	0.0980649	0.0713169	0.0926794	0.0612546	0.0939679	0.0160352	0.045816	0.265744	0.0618778	0.0778508	0.0523402	0.0488297	0.0794481	0.036978	0.0442139	0.0802321	0.0401402	0.0648549	0.116083	0.32321	0.0445879	0.0595769	0.0609521	0.0581931	0.0603454	0.082952	0.160112	0.0099977	0.117645	0.168841	0.145826	0.08451	0.174906	0.0473107	0.126466	0.0829764	0.104552	0.124595	0.13555	0.322208	0.0209119	0.0646784	0.0673109	0.0266779	0.079029	0.176591	0.431036
18:2p/16:0-DG	577.519	38.1603	0.154546	0.203719	0.543084	0.0860902	0.17598	0.0236636	0.101882	0.610688	0.068392	0.0805645	0.0895581	0.0885402	0.19041	0.0527697	0.0231812	0.226491	0.055669	0.0690203	0.13755	0.127173	0.0710695	0.0819504	0.143483	0.147133	0.0628549	0.117292	1.35973	0.028728	0.104954	0.2672	0.166305	0.107959	1.83573	0.0992882	0.624123	0.171559	0.219376	0.0202807	1.34393	2.55307	0.0306271	0.0398317	0.17362	0.0303941	0.110105	0.347753	0.259711
18:2p/18:2-DG	601.519	37.876	0.083373	0.0989226	0.284694	0.0314095	0.098133	0.00272237	0.045956	0.204334	0.0110658	0.0430788	0.0253433	0.0225673	0.0440975	0.0217407	0.00374573	0.0781852	0.0131387	0.0133141	0.0306317	0.0433459	0.0234348	0.0159457	0.0731304	0.0563498	0.0199333	0.0523195	0.609411	0.00566885	0.015353	0.0951131	0.04563	0.0414659	0.837591	0.0443566	0.193315	0.0849841	0.0689097	0.00479719	0.617969	1.4781	0.0046755	0.0170874	0.0684362	0.00155172	0.0435852	0.130612	0.114711
40:0-TG	712.645	36.0943	0.126795	0.131981	0.115938	0.114378	0.100682	0.145352	0.206035	0.16773	0.112625	0.0928851	0.0834932	0.0910436	0.113796	0.0658822	0.176572	0.0627742	0.0887903	0.116956	0.174435	0.125848	0.0552377	0.0901999	0.0711227	0.0770019	0.0792537	0.0697045	0.0680404	0.0560084	0.0638582	0.0787953	0.243723	0.0594339	0.0819818	0.0842816	0.0623125	0.0960437	0.102339	0.107545	0.139226	0.114142	0.0536292	0.0451472	0.0433046	0.0549232	0.0777412	0.0791687	0.101547
42:0-TG	740.676	36.7894	0.170432	0.144424	0.133847	0.134255	0.109649	0.246871	0.181865	0.179439	0.120929	0.0955658	0.0949105	0.0860163	0.109183	0.0615784	0.173778	0.0561676	0.102824	0.19655	0.16817	0.123881	0.0551266	0.0925881	0.0645231	0.0903371	0.0788217	0.0835049	0.108165	0.0502417	0.0612793	0.107111	0.167371	0.0524557	0.158302	0.0999694	0.0827755	0.113436	0.112683	0.0811603	0.190001	0.250863	0.0534146	0.0382132	0.0394269	0.0554069	0.100301	0.111171	0.119445
42:1-TG	738.661	36.1704	0.116316	0.0647437	0.0573335	0.0770953	0.035497	0.0245241	0.0489534	0.0513561	0.0490693	0.0220599	0.0341327	0.0297033	0.0690051	0.0204296	0.0422539	0.0260289	0.0472329	0.0847272	0.119687	0.0858641	0.0198637	0.0497452	0.0312712	0.0306118	0.0295135	0.0383982	0.0497796	0.0178415	0.0293385	0.0718561	0.0642921	0.0148342	0.0899294	0.0306689	0.0484728	0.0341137	0.0282853	0.0284335	0.162805	0.180909	0.0293286	0.0131265	0.0137343	0.0187026	0.0364415	0.081242	0.0543139
44:0-TG	768.708	37.2746	0.321927	0.215845	0.270211	0.251555	0.153763	0.48155	0.230482	0.289203	0.189505	0.151904	0.14977	0.143466	0.160464	0.0804403	0.245135	0.0899866	0.141835	0.474378	0.289443	0.186023	0.076652	0.149547	0.0903835	0.156668	0.115305	0.160704	0.263609	0.0842381	0.0975138	0.240395	0.179965	0.0760311	0.397982	0.181244	0.184237	0.195015	0.204377	0.100582	0.389676	0.443351	0.0853558	0.0544812	0.0587376	0.0889912	0.168406	0.218409	0.185175
44:2-TG	764.676	36.2604	0.14248	0.0701527	0.0842465	0.0881414	0.0363577	0.0523557	0.0750751	0.0680971	0.0595402	0.0252595	0.0435653	0.0314104	0.0733545	0.0195856	0.0384442	0.0395524	0.0558524	0.113931	0.143311	0.100733	0.0212762	0.0476626	0.0318012	0.0376458	0.0273337	0.0528375	0.0931607	0.0169083	0.0328539	0.151734	0.0171508	0.0130793	0.154787	0.0409872	0.0765306	0.0384185	0.0350044	0.0188222	0.23322	0.341529	0.034866	0.0110879	0.0130571	0.0188872	0.0361437	0.129765	0.0507907
46:0-TG	796.739	37.7701	0.560761	0.328525	0.5249	0.388795	0.256564	0.817163	0.321663	0.473141	0.276907	0.236995	0.281985	0.237272	0.267553	0.135264	0.375774	0.163774	0.21726	0.730523	0.451814	0.273541	0.143808	0.253746	0.16151	0.269082	0.215625	0.275975	0.538643	0.150658	0.174104	0.422543	0.230629	0.111565	0.590883	0.309514	0.407528	0.3147	0.354667	0.171571	0.536613	0.483128	0.140801	0.0934392	0.107002	0.140976	0.259165	0.365105	0.295709
46:1-TG	794.723	37.3563	0.786504	0.427857	0.684519	0.464197	0.234527	0.41873	0.285905	0.500137	0.322557	0.16927	0.278807	0.214878	0.340456	0.142694	0.262829	0.247754	0.264563	0.767831	0.702304	0.381638	0.127457	0.291155	0.196674	0.263503	0.166355	0.348085	0.921451	0.111655	0.173514	0.648694	0.165027	0.10102	1.49816	0.256829	0.548598	0.258016	0.259991	0.146686	1.48045	2.42029	0.185743	0.0826877	0.119456	0.108165	0.247281	0.653181	0.371141
46:2-TG	792.708	36.9228	0.471831	0.256931	0.358383	0.269114	0.135088	0.166832	0.267529	0.282423	0.192826	0.0951068	0.147603	0.114326	0.21576	0.0840481	0.134179	0.150909	0.169333	0.406497	0.461604	0.269897	0.0781686	0.172392	0.130616	0.145687	0.0923599	0.186743	0.524218	0.0632122	0.10075	0.563579	0.0656029	0.0640568	0.786085	0.143407	0.28908	0.14157	0.134275	0.0889387	0.933094	1.92455	0.11608	0.0454898	0.0601031	0.0629736	0.115408	0.433468	0.178565
46:3-TG	790.692	36.3067	0.100151	0.0540656	0.0689627	0.0569475	0.0256839	0.033266	0.0655935	0.0540074	0.0417883	0.0194715	0.031854	0.0223977	0.0456111	0.0166299	0.0219638	0.0429202	0.0381151	0.0711837	0.102763	0.0633165	0.0146587	0.0356688	0.0275952	0.0275364	0.0177964	0.0401649	0.106555	0.0105281	0.0217177	0.165962	0.0080408	0.0114704	0.149469	0.0335491	0.0604006	0.0312334	0.0255818	0.0117756	0.200948	0.407	0.0262305	0.00753976	0.00978435	0.0119766	0.0211598	0.108165	0.0394453
48:0-TG	824.77	38.1753	0.66505	0.425221	0.695079	0.447917	0.338703	0.976	0.386847	0.528834	0.338214	0.285355	0.272291	0.224658	0.241673	0.15929	0.379971	0.16676	0.215198	0.700615	0.542106	0.336619	0.168607	0.271994	0.187917	0.325988	0.274884	0.267558	0.872104	0.196704	0.227443	0.56384	0.310918	0.165501	1.01672	0.279672	0.498457	0.437975	0.413443	0.20045	0.746355	1.40138	0.193199	0.113548	0.135563	0.137915	0.316288	0.45418	0.396711
48:1-TG	822.755	37.8006	1.13746	0.764661	1.50602	0.662135	0.504842	0.614307	0.593737	1.35347	0.493652	0.323096	0.501823	0.382742	0.80786	0.276073	0.40524	0.52762	0.402601	0.927697	0.952997	0.631367	0.274501	0.489885	0.392469	0.522986	0.292188	0.547612	2.98082	0.184936	0.37186	1.11366	0.405891	0.213742	4.01836	0.449489	1.4545	0.577722	0.624235	0.243685	2.93847	4.43691	0.295204	0.176086	0.323165	0.177878	0.380885	1.05257	0.786938
48:2-TG	820.739	37.4161	1.01786	0.597813	1.16912	0.561952	0.370376	0.428593	0.58971	1.122	0.411421	0.229318	0.341052	0.264989	0.616963	0.214922	0.26623	0.535222	0.356761	0.728085	0.908267	0.556314	0.194867	0.383186	0.358871	0.359758	0.202105	0.443073	2.74831	0.132051	0.287103	1.2307	0.272971	0.165924	3.60151	0.362221	1.0263	0.469601	0.49087	0.164176	3.02852	6.70987	0.268739	0.129248	0.228953	0.140852	0.261038	0.991433	0.480568
48:3-TG	818.723	36.982	0.351017	0.220499	0.354868	0.18984	0.135701	0.0850274	0.240497	0.332905	0.143884	0.0811944	0.118156	0.0899259	0.205894	0.0717097	0.0901222	0.218372	0.131518	0.231342	0.329694	0.188517	0.0675377	0.131878	0.146112	0.122847	0.0664927	0.148075	0.848104	0.0439963	0.0868619	0.584389	0.086405	0.0628145	1.10593	0.134392	0.295683	0.168038	0.145328	0.0562212	1.15582	2.95277	0.097018	0.0467373	0.0646978	0.0434288	0.0774176	0.378739	0.156419
48:4-TG	816.708	36.4256	0.0355671	0.0314081	0.0523499	0.0249281	0.0203598	0.00510305	0.0175785	0.0438746	0.0122972	0.00739986	0.0165823	0.00805785	0.0290901	0.00562983	0.00165715	0.0336509	0.0166984	0.0214614	0.0369749	0.0253591	0.00639193	0.0162105	0.0284171	0.013063	0.0052539	0.0193692	0.140272	0.00176247	0.0119209	0.0660898	0.00825146	0.00909129	0.191009	0.0254	0.0404236	0.0271565	0.024907	0.00229181	0.206413	0.603539	0.01134	0.0084896	0.00676231	0.00488771	0.00900944	0.0538994	0.0328171
50:0-TG	852.801	38.6398	0.462904	0.333324	0.843358	0.298012	0.373768	0.583698	0.406737	0.745687	0.234717	0.224708	0.159936	0.200636	0.294207	0.125915	0.243202	0.267443	0.168857	0.550853	0.340291	0.288017	0.0883255	0.25319	0.212258	0.250149	0.219456	0.252299	1.51821	0.138148	0.21128	0.455579	0.356329	0.169558	0.697776	0.239155	0.264214	0.33114	0.454369	0.0990775	1.36857	1.84977	0.136536	0.0878612	0.214673	0.11953	0.212378	0.402766	0.382239
50:1-TG	850.786	38.2172	1.55097	1.0628	2.95224	0.631001	0.95538	0.698856	0.753027	2.50821	0.517492	0.570476	0.703113	0.502095	0.947487	0.341385	0.40915	1.04365	0.389831	0.870726	1.12256	0.818974	0.43242	0.636153	0.616686	0.705073	0.395928	0.656028	5.7621	0.245921	0.509201	1.34441	1.12749	0.405613	8.00609	0.547541	3.05677	0.851792	1.11862	0.303094	5.19749	7.54464	0.379823	0.284171	0.717673	0.211915	0.489614	1.39903	1.24825
50:2-TG	848.77	37.8099	1.75797	1.43323	3.4506	0.82293	1.13335	0.571392	1.1494	3.54425	0.744547	0.693758	0.762502	0.594254	1.54535	0.46933	0.464976	1.55635	0.620423	0.733774	1.36046	0.990283	0.518525	0.707559	0.98589	0.887349	0.436582	0.951567	8.06103	0.272393	0.678934	2.00215	1.43575	0.544132	10.348	0.790505	3.52899	1.32925	1.50025	0.314997	7.6325	14.3209	0.410148	0.374261	0.84447	0.271914	0.532062	2.08322	1.21123
50:3-TG	846.755	37.406	0.537392	0.607611	1.43731	0.244662	0.46263	0.167917	0.428217	1.59889	0.215342	0.279068	0.217317	0.189871	0.578821	0.184105	0.107165	0.898099	0.202081	0.151887	0.352813	0.269641	0.232206	0.211513	0.473696	0.304284	0.117278	0.366183	4.51158	0.0741649	0.249516	0.548175	0.674539	0.280881	4.80095	0.346637	1.41506	0.731293	0.653212	0.0964877	3.60802	10.6065	0.0880735	0.209648	0.33124	0.0751562	0.159254	1.08219	0.49636
50:4-TG	844.739	36.9918	0.225941	0.199644	0.270043	0.0952154	0.15009	0.0314707	0.139986	0.347984	0.0795547	0.0861384	0.0883521	0.0607478	0.149236	0.0610596	0.0453693	0.237695	0.0749238	0.0813203	0.149172	0.106991	0.0611011	0.0831933	0.130678	0.0860719	0.0442605	0.113408	1.03703	0.0312079	0.0731214	0.263503	0.131768	0.0887632	1.28801	0.144838	0.303639	0.183913	0.155667	0.0386735	1.12707	2.92191	0.0503319	0.0640765	0.0645376	0.0292951	0.0554591	0.308773	0.198927
50:5-TG	842.723	36.6124	0.0342705	0.0320205	0.0339739	0.0277352	0.0141248	0.0911127	0.0155119	0.111287	0.023169	0.0181155	0.0165681	0.0396526	0.0177275	0.00457769	0.0449376	0.040387	0.0299077	0.0447483	0.0510532	0.00680787	0.0100866	0.0139207	0.0169253	0.033745	0.0221317	0.0375782	0.132802	0.00563886	0.00873383	0.0250616	0.0329811	0.00523168	0.20031	0.0326967	0.049957	0.0701913	0.0702742	0.00713524	0.163363	0.435205	0.00727921	0.0111882	0.00365603	0.00284245	0.0085877	0.0528755	0.0439643
52:0-TG	880.833	39.0501	0.111478	0.0712039	0.233278	0.106319	0.10262	0.270331	0.235034	0.198338	0.0787749	0.0622606	0.0740475	0.0555952	0.0544383	0.0361967	0.096759	0.0671045	0.0528219	0.0949219	0.0531976	0.100936	0.0972845	0.0653421	0.0629005	0.0574595	0.0726742	0.0621911	0.458243	0.0415581	0.0577966	0.0854262	0.0567664	0.0468624	0.744422	0.0700296	0.25012	0.0696612	0.17789	0.0445951	0.580867	0.77836	0.0343098	0.0332488	0.031294	0.036001	0.0460791	0.0859382	0.145752
52:1-TG	878.817	38.6159	0.447268	0.358436	1.19767	0.19401	0.366731	0.220888	0.265911	0.979467	0.147218	0.178479	0.282601	0.18404	0.290125	0.114666	0.147087	0.337954	0.141935	0.214224	0.325072	0.304615	0.152434	0.223847	0.207732	0.287982	0.158522	0.217371	2.30364	0.0933076	0.189456	0.447787	0.24088	0.140549	3.72421	0.199258	1.26053	0.327276	0.389996	0.102019	2.94966	4.2284	0.0967522	0.103694	0.292301	0.0792455	0.167667	0.430708	0.706493
52:2-TG	876.801	38.1968	2.8025	3.33421	8.80761	1.63171	3.16097	0.847974	2.37202	10.2357	1.40999	1.41908	1.55684	1.52518	2.78146	1.1559	0.86715	3.6299	1.05791	0.899243	2.07656	2.16997	1.07355	1.21508	2.12679	2.12246	0.883558	1.73177	16.8857	0.541899	1.13937	3.13369	3.1848	1.4672	23.1863	1.6038	7.03292	2.66517	2.93953	0.62457	19.368	30.6088	0.573606	0.785639	2.64855	0.552474	1.22547	3.48426	3.14369
52:3-TG	874.786	37.8793	3.42455	3.81904	7.78586	1.24564	3.68213	0.606429	2.5938	8.61992	1.2424	1.55332	1.36169	1.15557	2.30196	1.14615	0.718473	3.70198	1.00127	0.8322	2.04121	2.16536	0.984515	1.07559	2.71543	2.23818	0.839407	1.7504	17.1576	0.470781	0.897164	3.49769	3.20198	1.47141	21.5995	1.86594	6.28842	3.03775	2.67257	0.492365	19.1271	34.1689	0.422638	1.0307	2.29486	0.452126	1.09067	4.11696	3.30672
52:4-TG	872.77	37.4853	1.86122	1.68535	2.56428	0.473896	1.74689	0.303074	1.09194	2.71417	0.491069	0.803981	0.660694	0.458813	0.744923	0.49837	0.289028	1.68287	0.434975	0.390947	0.793923	0.939511	0.42299	0.497506	1.20981	0.876498	0.38755	0.7751	7.9931	0.249755	0.372972	1.32909	1.37831	0.722808	10.0845	0.985236	2.47681	1.35992	1.00026	0.21863	9.35258	18.6966	0.228007	0.611586	0.721369	0.200077	0.424249	2.0003	1.75874
52:5-TG	870.755	37.431	0.455545	0.435252	0.454775	0.15871	0.396574	0.21917	0.240646	0.650444	0.15343	0.247439	0.181117	0.170739	0.194422	0.116873	0.130199	0.398775	0.146331	0.136258	0.249004	0.210327	0.128874	0.151723	0.229277	0.199921	0.117275	0.201225	1.56058	0.0823718	0.111115	0.307006	0.296662	0.220592	2.21145	0.315193	0.566229	0.368754	0.280686	0.0748766	2.02649	4.14183	0.0825563	0.143842	0.121488	0.0574277	0.108052	0.47766	0.472147
52:6-TG	868.739	36.7851	0.0580091	0.0624735	0.0465496	0.0246298	0.0522442	0.000298183	0.0123462	0.0738314	0.0150142	0.0315215	0.0242158	0.0246916	0.0229193	0.0105252	0.00126539	0.0625407	0.0161014	0.0278393	0.0432031	0.0223003	0.0253486	0.0129455	0.0276352	0.0169399	0.019007	0.0451184	0.181204	0.00674116	0.0155524	0.0457085	0.0342971	0.0388936	0.390638	0.0623398	0.0910587	0.0618873	0.0508542	0.00307003	0.270072	0.501707	0.0124385	0.0215345	0.0100389	0.00529311	0.0197464	0.0809705	0.0936854
52e:2-TG	862.822	38.03	0.0192312	0.0109869	0.026785	0.0127691	0.0235642	0.00800376	0.00816319	0.0269273	0.0089195	0.0146743	0.0079115	0.00749898	0.00949737	0.00225922	0.00223185	0.00768361	0.00558552	0.00838071	0.019701	0.0104908	0.00559566	0.00852067	0.0070603	0.00861193	0.00286766	0.00993904	0.0332122	0.00142958	0.00379966	0.0392122	0.00411656	0.0056325	0.0695303	0.00513675	0.0346305	0.00384696	0.00837278	0.00138383	0.0523191	0.0969392	0.00566187	0.00349754	0.00834834	0.00267269	0.0108156	0.0202688	0.00654487
52p:1-TG	862.822	38.03	0.0192009	0.0108613	0.0257325	0.0126299	0.0227995	0.0072755	0.00774591	0.0247827	0.00869507	0.0142794	0.00753006	0.00720095	0.00903291	0.00132844	0.00191781	0.00743475	0.00303136	0.00828098	0.019731	0.0104956	0.00422975	0.00793358	0.00524956	0.00850721	0.0012408	0.00895205	0.0317655	0.000578306	0.00162055	0.0388889	0.0035368	0.00532785	0.0695947	0.00280053	0.0345045	0.00226994	0.00819646	0.000987725	0.0512002	0.0966015	0.00157143	0.00271897	0.00830299	0.000870859	0.0105747	0.0201972	0.00325045
54:0-TG	908.864	39.459	0.0858508	0.0614451	0.125619	0.0843863	0.0753621	0.243066	0.129854	0.0856812	0.0799703	0.0443571	0.0539827	0.0449289	0.0378519	0.0275824	0.0611624	0.0222905	0.0412922	0.0970865	0.0490179	0.0675207	0.111921	0.0600488	0.0357033	0.0518124	0.0536273	0.0501186	0.0584798	0.0320825	0.0399411	0.0686101	0.0540165	0.0369771	0.10467	0.0627188	0.0462194	0.0692413	0.0944631	0.0345978	0.102794	0.121546	0.0233971	0.0205364	0.0191117	0.0224153	0.0498998	0.0523106	0.061208
54:1-TG	906.848	39.009	0.100288	0.0618582	0.175587	0.0509544	0.0669421	0.08292	0.050761	0.131159	0.0344257	0.0357391	0.0566365	0.0364874	0.0469808	0.0208913	0.034788	0.0383365	0.0301064	0.099845	0.0597405	0.0484361	0.0307323	0.044339	0.0385423	0.0533079	0.0352968	0.0477847	0.978008	0.019421	0.0315106	0.113495	0.0333588	0.0294724	0.511053	0.0413268	0.179523	0.0582894	0.0714021	0.0232472	0.475727	0.631407	0.0245179	0.0233783	0.0433293	0.0177499	0.0392455	0.0813919	0.283114
54:2-TG	904.833	38.5944	0.471227	0.54908	2.27117	0.254447	0.5864	0.191151	0.348819	1.42856	0.186327	0.205214	0.258834	0.237273	0.302954	0.150845	0.144076	0.36185	0.147839	0.140908	0.286878	0.347162	0.166289	0.173585	0.278109	0.341432	0.142655	0.238568	3.38009	0.0689641	0.13148	0.484868	0.229356	0.170882	5.9479	0.226688	1.28481	0.34031	0.383568	0.0850491	4.21848	8.04776	0.0739865	0.102905	0.400733	0.0751062	0.147095	0.433138	0.600336
54:3-TG	902.817	38.1813	1.41089	1.96877	5.53082	0.973472	2.01273	0.36002	1.12106	4.31183	0.700738	0.67776	0.652733	0.825138	1.13541	0.492621	0.396278	1.33253	0.46815	0.360397	0.792086	1.01055	0.562783	0.508575	1.10855	0.928747	0.461807	0.711559	9.74191	0.244488	0.353979	1.59353	0.897971	0.593355	14.0111	0.738019	3.27334	1.28405	1.12442	0.23683	10.5315	19.3499	0.223508	0.443437	1.13226	0.217373	0.52749	1.67075	1.44867
54:4-TG	900.801	37.832	1.52286	2.05851	4.45671	0.799087	2.10037	0.302824	1.15189	3.3155	0.594771	0.845469	0.656522	0.624618	0.87816	0.487838	0.366768	1.51645	0.537395	0.345546	0.91396	0.955241	0.499607	0.572863	1.2026	0.904336	0.511463	0.752146	8.83225	0.246566	0.324461	1.41258	0.916875	0.747962	10.9149	1.01948	2.79567	1.37765	1.04823	0.222861	9.03345	18.4147	0.221421	0.522469	0.949098	0.227748	0.488963	1.73556	1.65903
54:5-TG	898.786	37.4	1.21671	1.29749	2.02732	0.476597	1.42841	0.377974	0.674781	1.83583	0.446946	0.65703	0.478722	0.409388	0.465948	0.343388	0.328184	0.96071	0.379248	0.306844	0.634308	0.677721	0.34753	0.417757	0.813109	0.581234	0.366778	0.498128	5.17936	0.220041	0.251365	0.76819	0.657398	0.556305	6.90916	0.738075	1.61867	0.911113	0.644786	0.186674	5.90534	12.0828	0.198398	0.389715	0.465909	0.171073	0.319317	1.22574	1.39613
54:6-TG	896.77	37.3	0.544157	0.505981	0.494841	0.163799	0.534385	0.0621162	0.224581	0.604256	0.189287	0.300745	0.245585	0.146643	0.171414	0.126229	0.111086	0.442278	0.162252	0.140503	0.29479	0.252092	0.200847	0.217729	0.27615	0.205568	0.186401	0.265985	1.54596	0.106556	0.116515	0.291903	0.264974	0.279527	2.5978	0.385572	0.648481	0.419954	0.298733	0.0907883	2.0514	3.69872	0.101092	0.196282	0.129647	0.0710133	0.146822	0.548668	0.691774
54:7-TG	894.755	36.7	0.132018	0.153539	0.0842029	0.0440022	0.121975	0.00241821	0.0346839	0.123542	0.0492101	0.0825897	0.0724887	0.0470015	0.0383587	0.0316529	0.0218131	0.111111	0.0392113	0.0385449	0.0754577	0.0719197	0.0814291	0.0556252	0.0762455	0.0398052	0.0511519	0.0835599	0.274591	0.0250569	0.0300731	0.0584846	0.0486616	0.086213	0.599966	0.119967	0.156001	0.131212	0.073549	0.0182783	0.45632	0.619332	0.027275	0.0559952	0.0240239	0.0188459	0.032845	0.117419	0.221188
56:3-TG	930.848	38.5603	0.0697383	0.0608983	0.288609	0.0573789	0.0710659	0.0277861	0.0517211	0.154904	0.0340741	0.0303704	0.0300693	0.0288772	0.0428728	0.0226441	0.0225033	0.0436228	0.0270358	0.0204736	0.0396517	0.0483322	0.0217186	0.0262717	0.0389931	0.0361084	0.0236707	0.0286216	0.407845	0.0109303	0.0139669	0.0724631	0.0233736	0.0230611	0.786682	0.0273615	0.115977	0.0509905	0.0423663	0.0127488	0.592624	1.1538	0.0110302	0.0190707	0.0470752	0.0116776	0.020355	0.0423493	0.111437
56:4-TG	928.833	38.15	0.136739	0.129993	0.440134	0.0693207	0.183319	0.0244279	0.0858219	0.314583	0.0517373	0.0905718	0.0597232	0.0548229	0.0843933	0.0499515	0.0333549	0.142281	0.0602069	0.0256404	0.0832257	0.0908043	0.0373678	0.0700029	0.0685414	0.0761074	0.0619307	0.0673759	0.758067	0.0234477	0.0293285	0.139046	0.0674953	0.0660353	1.02517	0.0708812	0.240518	0.115878	0.101838	0.0196905	1.10448	1.62478	0.0217695	0.0539468	0.0978992	0.0258337	0.046702	0.129557	0.202994
56:5-TG	926.817	38.011	0.238693	0.239754	0.498295	0.140837	0.313663	0.16865	0.21912	0.548887	0.134435	0.218268	0.150341	0.134986	0.16019	0.133861	0.131209	0.310163	0.137434	0.0846952	0.201941	0.17744	0.105374	0.179197	0.172062	0.154294	0.16333	0.156501	1.05572	0.0762681	0.0792426	0.212189	0.176219	0.171107	1.46051	0.159849	0.392227	0.256427	0.225477	0.0659454	1.07863	2.59017	0.0683504	0.138898	0.168503	0.0716745	0.130541	0.253915	0.311112
56:6-TG	924.801	37.659	0.293411	0.297108	0.526164	0.14381	0.369879	0.0711533	0.235419	0.622249	0.138182	0.261304	0.182384	0.147329	0.171232	0.13752	0.0916253	0.401254	0.146559	0.0904067	0.233862	0.208315	0.151441	0.201563	0.230493	0.176097	0.18149	0.219457	1.26467	0.0851632	0.0910255	0.242845	0.221175	0.225322	1.9372	0.22073	0.453348	0.369616	0.276211	0.055978	1.17395	2.7462	0.0730133	0.174304	0.172807	0.0731746	0.14585	0.344294	0.488844
56:7-TG	922.786	37.35	0.223171	0.329243	0.365681	0.129589	0.324726	0.0584461	0.191292	0.385234	0.113395	0.257967	0.201785	0.15299	0.121456	0.110739	0.103415	0.330458	0.112889	0.0820674	0.199282	0.187099	0.213515	0.171966	0.227875	0.11945	0.186267	0.241297	0.896513	0.0637472	0.0640116	0.197012	0.156009	0.2118	1.94197	0.219671	0.418975	0.403673	0.22823	0.0700884	0.988472	1.55728	0.063736	0.195765	0.105603	0.0686574	0.12348	0.314784	0.506053
56:8-TG	920.77	37.1693	0.0948675	0.14086	0.0820411	0.0386707	0.129806	0.0106522	0.0613764	0.117671	0.0362547	0.104796	0.0852171	0.060184	0.0379378	0.0382773	0.0312595	0.119547	0.0362201	0.0244861	0.0682463	0.0697825	0.101317	0.0618907	0.0927249	0.0381786	0.0604825	0.0920625	0.210081	0.0249394	0.021284	0.0599863	0.0555206	0.0949373	0.750048	0.0840524	0.161239	0.175925	0.0732396	0.0257731	0.369403	0.486482	0.0236561	0.0844491	0.0307144	0.0217114	0.0428887	0.126143	0.284894
56:9-TG	918.755	36.7258	0.0205609	0.037672	0.0155082	0.0110565	0.0334524	0.00200163	0.00258845	0.021051	0.0101056	0.0330578	0.0264202	0.0168717	0.0105042	0.0114804	0.000366032	0.0267264	0.0129229	0.00747751	0.0190094	0.0169038	0.0394836	0.015736	0.0190925	0.00759366	0.0149183	0.0280165	0.0344384	0.0105374	0.00695655	0.0141536	0.0122987	0.0337431	0.110949	0.0253388	0.0400778	0.0462316	0.020352	0.00100266	0.0623977	0.0574811	0.0128831	0.0234145	0.00896038	0.00715169	0.0110962	0.0257921	0.0721557
58:10-TG	944.77	36.7673	0.0145466	0.014012	0.00729704	0.00656329	0.0295769	0.0012725	0.00985323	0.00896167	0.00801914	0.026082	0.0142738	0.00981322	0.0086969	0.00652405	0.00619007	0.0150055	0.0105407	0.00353563	0.00790837	0.00976534	0.0290663	0.0157519	0.00737636	0.00324888	0.0201864	0.0109441	0.0171881	0.00466571	0.00231174	0.00661602	0.00350312	0.0188134	0.103995	0.00716842	0.0121935	0.0531204	0.015042	0.00552407	0.0383439	0.0280653	0.00592292	0.0168113	0.00358229	0.00601133	0.00772074	0.00946452	0.0607286
58:3-TG	958.88	38.9162	0.012971	0.00742684	0.0230334	0.0107861	0.00790583	0.00622167	0.00587623	0.0124443	0.00470788	0.00563093	0.00438294	0.00321667	0.00530621	0.00177534	0.00214549	0.00444133	0.00385527	0.0081054	0.00850615	0.00618146	0.00246721	0.00512413	0.00404491	0.0040086	0.00575295	0.00513725	0.0227696	0.00146532	0.00267498	0.0205206	0.00170802	0.00373912	0.0856692	0.00363764	0.0130195	0.00653693	0.00548402	0.00119504	0.0534742	0.0708164	0.00219637	0.0033639	0.00358164	0.00160481	0.00403523	0.00956841	0.0406486
58:4-TG	956.864	38.56	0.00567129	0.00327352	0.0165137	0.0051701	0.00496966	0.00115096	0.00116544	0.00627895	0.00161194	0.00352117	0.000980327	0.000549013	0.00239241	0.000686951	0.000818178	0.00390986	0.00309349	0.00236868	0.00333293	0.00334802	0.000403626	0.00255642	0.00204856	0.000533745	0.0036223	0.00258393	0.0199658	0.000227919	0.000702809	0.00835175	0.00040718	0.00186178	0.0771989	0.00144488	0.00834718	0.00321702	0.00385719	0.000149797	0.0400099	0.105386	0.000864789	0.0032215	0.00273253	0.000868387	0.0018555	0.00504263	0.0318521
58:5-TG	954.848	38.4	0.0185891	0.0172568	0.0588515	0.0188554	0.0402375	0.0479873	0.0216062	0.0400162	0.00458143	0.0209314	0.0110937	0.0128205	0.0122411	0.00490812	0.00824159	0.0101611	0.0164929	0.00974834	0.00681005	0.0170799	0.00620825	0.0136794	0.00596748	0.0106292	0.0201012	0.00899343	0.0783836	0.00618639	0.00377621	0.0173358	0.00810788	0.0102172	0.163144	0.00957424	0.0344634	0.0230336	0.0266222	0.0023127	0.0827556	0.252938	0.00466254	0.0124816	0.00721371	0.00530817	0.00859833	0.0158743	0.0451806
58:6-TG	952.833	38.0602	0.0266924	0.0314223	0.114889	0.0245463	0.0431195	0.010172	0.029904	0.0549484	0.016639	0.0348829	0.0226329	0.0180208	0.0266073	0.017478	0.0129935	0.0515897	0.0236639	0.0077824	0.020234	0.0292579	0.0207967	0.030071	0.0195675	0.0149301	0.0369296	0.0264624	0.145571	0.00905637	0.00696909	0.0237804	0.0153416	0.0278751	0.283638	0.0169364	0.0563779	0.0552454	0.0429395	0.0058769	0.135591	0.443625	0.00653546	0.0310678	0.0334636	0.0109065	0.0191289	0.0238478	0.0855906
58:8-TG	948.801	37.5321	0.050787	0.0935153	0.141652	0.040744	0.0824896	0.0154735	0.0584712	0.0958551	0.0355367	0.0743725	0.0585197	0.0544251	0.0416377	0.0352439	0.0295552	0.0884712	0.042681	0.0189616	0.0512583	0.0603157	0.0641926	0.0618044	0.062717	0.0315331	0.0708719	0.0655574	0.305661	0.0167344	0.0155622	0.0436316	0.0337832	0.0571556	0.677532	0.0655421	0.129823	0.140097	0.0713159	0.0201042	0.245384	0.447233	0.0183193	0.0652517	0.0335632	0.0253114	0.0392088	0.0764427	0.207065
58:9-TG	946.786	37.1921	0.0312785	0.0569098	0.0406215	0.020261	0.059976	0.00482332	0.0279856	0.0528109	0.0197575	0.0953852	0.0429121	0.0312513	0.0203912	0.0177713	0.0167459	0.0957414	0.0239878	0.010121	0.035423	0.0341047	0.100358	0.0408786	0.0407231	0.0143154	0.0465633	0.096281	0.164142	0.0118528	0.00779564	0.0222845	0.0205552	0.124708	0	0.0854697	0.120455	0.147541	0.044273	0.0132349	0.170618	0.183247	0.0131673	0.0763301	0.0145391	0.015098	0.024033	0.0951992	0.213623
60:12-TG	968.77	36.8501	0.00412955	0.013279	0.00788183	0.00717996	0.0060966	0.00393385	0.0110737	0.00716187	0.00740326	0.00887743	0.0132101	0.0105171	0.00719083	0.00486468	0.00791987	0.01036	0.007914	0.0035392	0.00466304	0.0103977	0.0136432	0.0149881	0.00756682	0.00375815	0.020462	0.00970253	0.0034951	0.00210479	0.00201792	0.00456401	0.00197791	0.0041566	0.0238161	0.00574806	0.00935696	0.0177102	0.0151965	0.00549837	0.00607368	0.00501147	0.00300549	0.0135902	0.0026295	0.00538275	0.00834504	0.00608276	0.0073253
*MCI=mild cognitive impairment; AD = Alzheimer's disease
*LPC=lysophosphatidylcholine; PC=phosphatidylcholine; LdMePE=lysomethylphosphatidylethanolmine; LPE=lysophoshatidylethanolamine; dMePE=dimethylphosphatidylethanolamine; PE=phosphatidylethanolamine; cPA=cyclic phosphatidic aicd; PG=phosphatidylglycerol; PI=phosphatidylinositol; Cer=ceramide; MHC=monohexosylceramide; SM=sphingomyelin; ChE=cholesteryl ester; DG=diacylglycerol; TG=triacylglycerol
[truncated: 7 more columns]
