# Supplementary material for: Cerebrospinal fluid lipidomics for biomarkers of Alzheimer's disease
Source: Royal Society of Chemistry journal article supplement (doi:10.1039/d0mo00186d), 2021-03-18
Supplement: d0mo00186d2.pdf [file d0mo00186d2.pdf]

**SUPPLEMENTARY INFORMATION:**

**Cerebrospinal fluid lipidomics for biomarkers of Alzheimer's disease**

**Seul Kee Byeon<sup>1,2</sup>, Anil K. Madugundu<sup>1,2,3,4</sup>, Ankit P. Jain<sup>3</sup>, Firdous A. Bhat<sup>3,5</sup>, Jae Hun Jung<sup>1,2,6</sup>, Santosh Renuse<sup>1,2</sup>, Jacqueline Darrow<sup>7</sup>, Arnold Bakker<sup>8</sup>, Marilyn Albert<sup>7</sup>, Abhay Moghekar<sup>7,\*</sup>, Akhilesh Pandey<sup>1,2,9,10,\*</sup>**

<sup>1</sup>Department of Laboratory Medicine and Pathology, Mayo Clinic, Rochester MN, 55902 USA

<sup>2</sup>McKusick-Nathans Institute of Genetic Medicine, Johns Hopkins University School of Medicine, Baltimore MD, 21205 USA

<sup>3</sup>Institute of Bioinformatics, International Technology Park, Bangalore 560 006, India

<sup>4</sup>Manipal Academy of Higher Education, Manipal, 576 104, India

<sup>5</sup>Amrita School of Biotechnology, Amrita Vishwa Vidyapeetham, Kollam 691 001, India

<sup>6</sup>Department of Chemistry, Kyung Hee University, Yongin 17104, South Korea

<sup>7</sup>Department of Neurology, Johns Hopkins University School of Medicine, Baltimore MD, 21205, USA

<sup>8</sup>Department of Psychiatry and Behavioral Sciences, Johns Hopkins University School of Medicine, Baltimore MD, 21205, USA

<sup>9</sup>Center for Individualized Medicine, Mayo Clinic, Rochester, MN 55905, USA

<sup>10</sup>Department of Biological Chemistry, Pathology and Oncology, Johns Hopkins University School of Medicine, Baltimore MD, 21205 USA

\*Co-corresponding authors

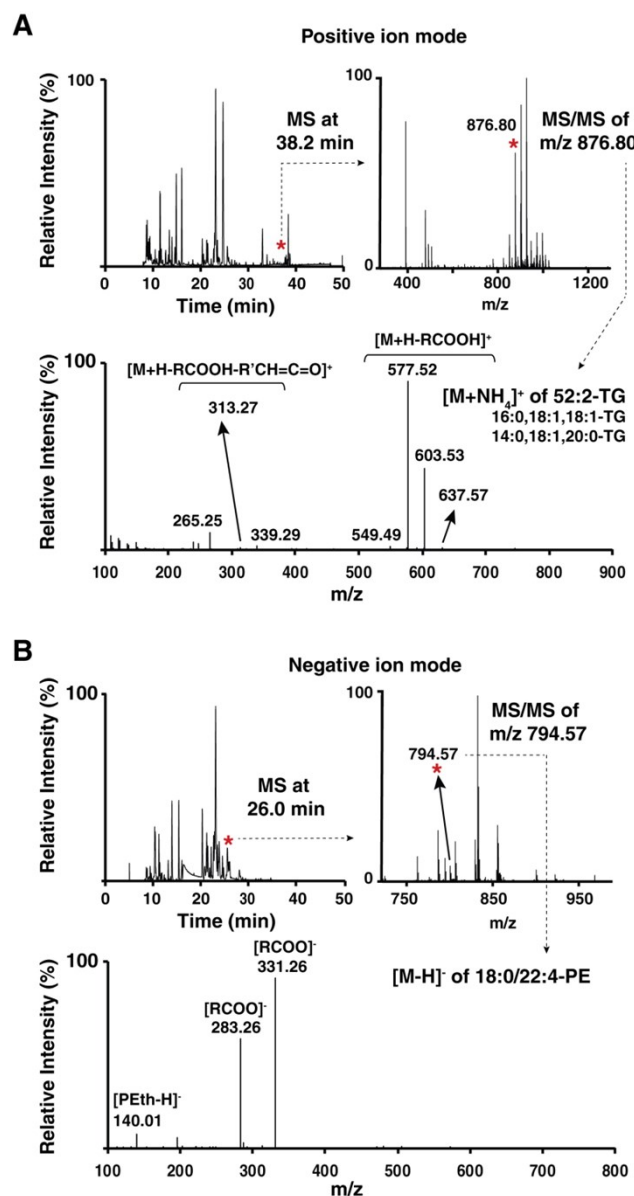

**Fig. S1. Base peak chromatograms and MS/MS spectra using LC-MS/MS.** (A) A peak with  $m/z$  of 876.80 in positive ion mode at 38.2 min of a control sample was identified as 52:2-triacylglycerol (TG) detected in ammonium adduct with multiple isomers. R represents the fatty acid. (B) A peak with  $m/z$  of 794.57 at 26 min in negative ion mode of a control sample was identified as 18:0/22:4-phosphatidylethanolamine (PE). Carboxylate anions ( $[RCOO]^-$ ) correspond to the structures of two fatty acyl chains and deprotonated phosphoethanolamine ( $[PEth-H]^-$ ) confirms the head group of PE.

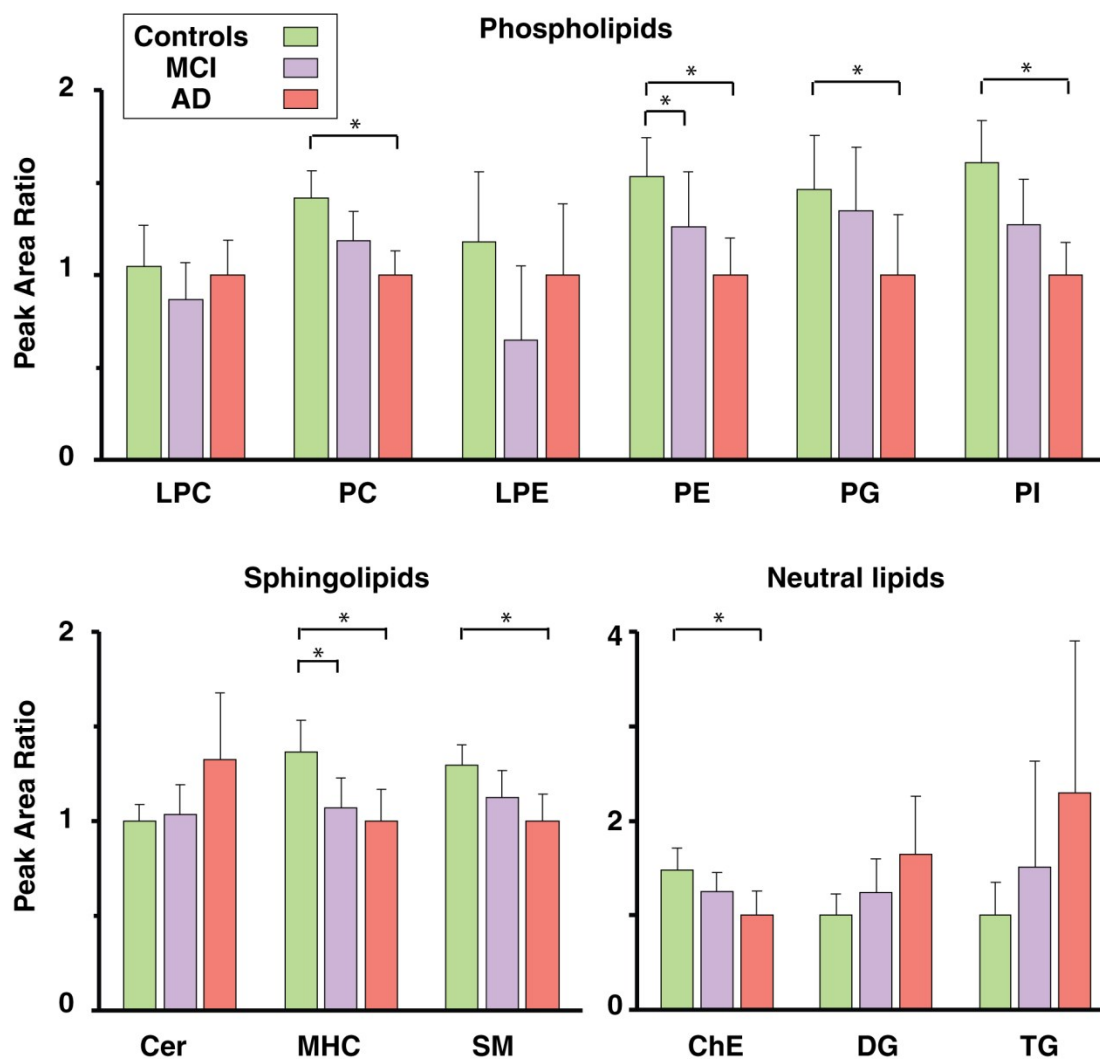

**Fig. S2. Relative peak area of CSF lipids in MCI and AD.** Bar graphs representing relative changes of each class of lipids in mild cognitive impairment (MCI, purple) and Alzheimer's disease (AD, red) in respect to controls (green) are illustrated. Error bars are indicated in each group. Classes that showed significant difference ( $P < .05$ ) in MCI or AD compared to controls are marked with asterisk.

LPC, lysophosphatidylcholine; PC, phosphatidylcholine; LPE, lysophosphatidylethanolamine; PE, phosphatidylethanolamine; PG, phosphatidylglycerol; PI, phosphatidylinositol; Cer, ceramide; MHC, monohexosylceramides; SM, sphingomyelin; ChE, cholesteryl ester; DG, diacylglycerol; TG, triacylglycerol.
